# Supplementary material for: Testing the functional tolerance of the Piers–Rubinsztajn reaction: a new strategy for functional silicones
Source: Royal Society of Chemistry journal article supplement (doi:10.1039/c0cc00369g), 2010-01-01

---

# Testing the Functional Tolerance of the Piers-Rubinsztajn Reaction: A New Strategy for Functional Silicones

John B. Grande,<sup>a</sup> David B. Thompson,<sup>a,b</sup> Ferdinand Gonzaga<sup>a</sup> and Michael A. Brook<sup>a\*</sup>

## Experimental Section

---

### 1. Materials and Methods

---

Allyltriethoxysilane, allyltrimethoxysilane, vinyltriethoxysilane, methylphenylvinylsilane, dimethylphenylsilane, pentamethyldisiloxane, 1,1,1,3,5,5,5-heptamethyltrisiloxane, (3-glycidioxy)propyltri-methoxysilane and (3-iodopropyl)trimethoxysilane were purchased from Gelest and used as received. Vinyltrimethoxysilane (98%), tetramethyl orthosilicate (98%), tetraethyl orthosilicate (98%), (3-chloropropyl)trimethoxysilane (97%), (3-chloropropyl)triethoxysilane (95%), dodecanethiol (>98%), (3-mercaptopropyl)trimethoxysilane (95%), (3-aminopropyl)trimethoxysilane (97%), diethyl acetylenedicarboxylate (95%), chromium (III) acetylacetonate, anhydrous dimethylformamide, sodium azide and tris(pentafluorophenyl)borane (95%) were purchased from Aldrich and used as received.

Commercial solvents: hexane, dichloromethane and toluene were dried over activated alumina prior to use.

<sup>1</sup>H NMR, <sup>13</sup>C NMR and <sup>29</sup>Si NMR experiments were recorded at room temperature and performed on Bruker Avance 200, 500 and 600 MHz nuclear magnetic resonance spectrometers. High-resolution mass Spectrometry was performed with a Hi-Res Waters/Micromass Quattro Global Ultima (Q-TOF mass spectrometer).

### 2. General Procedure for exploring functional group tolerance:

---

Initially, survey experiments using the Piers-Rubinsztajn reaction were tested on a series of silicone compounds with different functional groups on an NMR scale. When the initial results were positive, the reaction was scaled up and compounds were isolated.

---

This general procedure applies to the reaction of pentamethyldisiloxane with (3-aminopropyl)triethoxysilane, (3-glycidoxypropyl)trimethoxysilane, and (3-mercaptopropyl)trimethoxysilane,.

**A. Reaction of pentamethyldisiloxane with (3-aminopropyl)triethoxysilane (Figure 4A)**

To a solution of (3-aminopropyl)triethoxysilane (0.150 g, 0.67 mmol) in dry hexane (5 ml), was added pentamethyldisiloxane (0.402 g, 2.7 mmol). The mixture was stirred at room temperature for 5 min before the addition of tris(pentafluorophenyl)borane (10  $\mu$ l of a solution containing 40 mg dissolved in 1 ml of toluene,  $7.8 \times 10^{-4}$  mmol). The reaction was monitored for 1 h with no evidence of the typical exotherm associated with the Piers-Rubinsztajn reaction. The mixture was left for an additional 12 h, and resulting solution was examined via NMR. The spectrum obtained was that of starting material, indicating no reaction had taken place.

**B. Reaction of pentamethyldisiloxane with (3-mercaptopropyl)trimethoxysilane 4 (Figure 4B)**

To a solution of (3-mercaptopropyl)trimethoxysilane (0.250 g, 1.27 mmol) in dry hexane (10 ml), was added pentamethyldisiloxane (0.848 g, 5.72 mmol). The mixture was stirred at room temperature for 5 min before the addition of tris(pentafluorophenyl)borane (20  $\mu$ l of a solution containing 40 mg dissolved in 1 ml of toluene,  $1.6 \times 10^{-3}$  mmol). After a 45 s induction time, slight bubbling from the solution occurred, and continued for 5 min. The mixture was allowed to cool to room temperature before the addition of neutral alumina (1.0 g). The resulting solution was filtered, purged with nitrogen, to remove residual solvent and subjected to Kugelrohr distillation (2 mm Hg, 120 degrees centigrade). The product, obtained as a colorless oil was then examined via NMR. The obtained spectrum had shown complete loss of the methoxy moieties, with slight evidence of an SH signal still present (~ 10 %), signifying slight cleavage of the prepared thiol-silicon linkage during filtration.

*Data for protected thiol*

---

$^1\text{H}$  NMR ( $\text{CDCl}_3$ , 500 MHz):  $\delta$  2.55 (t, 2 H's,  $\text{O}_3\text{SiCH}_2\text{CH}_2\text{CH}_2\text{SR}$ ,  $J = 7.6$  Hz), 1.67-1.74 (m, 2 H's,  $\text{O}_3\text{SiCH}_2\text{CH}_2\text{CH}_2\text{SR}$ ), 0.62-0.65 (m, 2 H's,  $\text{O}_3\text{SiCH}_2\text{CH}_2\text{CH}_2\text{SR}$ ), 0.35 (s, 6 H's,  $\text{CH}_2\text{SSi}(\text{CH}_3)_2\text{SiO}(\text{CH}_3)_3$ ), 0.14 (s, 9 H's,  $\text{CH}_2\text{SSi}(\text{CH}_3)_2\text{SiO}(\text{CH}_3)_3$ ), 0.11 (s, 27 H's,  $\text{H}_2\text{CSi}(\text{OSi}(\text{CH}_3)_2\text{OSi}(\text{CH}_3)_3)_3$ ), 0.08 ppm (s, 18 H's,  $\text{H}_2\text{CSi}(\text{OSi}(\text{CH}_3)_2\text{OSi}(\text{CH}_3)_3)_3$ .  $^{13}\text{C}$  NMR ( $\text{CDCl}_3$  125 MHz):  $\delta$  29.57, 27.01, 14.26, 2.67, 1.95, 1.26 ppm.

### C. Reaction of pentamethyldisiloxane with (3-glycidoxypropyl)trimethoxysilane (Figure 4C)

To a solution of (3-glycidoxypropyl)trimethoxysilane (0.150 g, 0.63 mmol) in dry hexane (5 ml), was added pentamethyldisiloxane (0.376 g, 2.5 mmol). The mixture was stirred at room temperature for 5 min before the addition of tris(pentafluorophenyl)borane (10  $\mu\text{l}$  of a solution containing 40 mg dissolved in 1 ml of toluene,  $7.8 \times 10^{-4}$  mmol). After a 30 s induction time, the reaction flask becomes warm, signifying the onset of an exothermic reaction, lasting roughly 10 min. The mixture was allowed to cool to room temperature before the addition of neutral alumina (1.5 g). The resulting solution was filtered and examined via NMR. The obtained spectrum was had shown evidence of complete loss epoxide, with no evidence of reaction at the methoxy moieties. The major and minor product deduced by proton and carbon NMR experiments are shown below.

#### Major Product: (~ 88% by NMR)

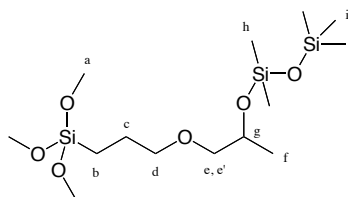

$^1\text{H}$  NMR ( $\text{CDCl}_3$ , 500 MHz):  $\delta$  4.01-4.05 (m, 1 H, **g**,  $J = 6.0$  Hz) 3.56 (s, 9 H's, **a**), 3.39-3.39-3.43 (m, 2 H's, **d**), 3.37 (dd, 1 H, **e**,  $J = 6.0, 9.6$  Hz), 3.24 (dd, 1 H, **e'**,  $J = 6.0, 9.6$  Hz), 1.66 (m, 2 H's, **c**), 1.17 (d, 3 H's, **f**,  $J = 6$  Hz), 0.65-0.68 (m, 2 H's, **b**), 0.09 (s, 9 H's, **i**), 0.07 ppm (s, 6 H's, **h**).  $^{13}\text{C}$  NMR ( $\text{CDCl}_3$  125 MHz):  $\delta$  76.53, 73.56, 67.23, 50.64, 22.93, 20.94, 5.39, 1.92, -0.15 ppm.  $^{29}\text{Si}$  NMR ( $\text{CDCl}_3$ , 99 MHz, 1 % w/v  $\text{Cr}(\text{acac})_3$ ):  $\delta$  7.07 (M), -13.56 (D), -42.01 ppm (T). HRMS (ES Positive mode):  $m/z$   $[\text{M}+\text{H}^+]$  calculated = 385.1898, found = 385.1878.

**Minor Product: (~ 12% by NMR)**

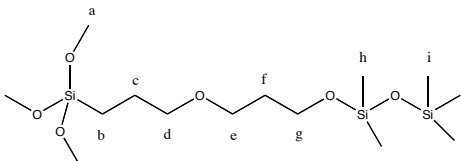

$^1\text{H}$  NMR ( $\text{CDCl}_3$ , 500 MHz):  $\delta$  3.72 (t, 2 H, **g**,  $J = 6.4$  Hz), 3.48 (t, 2 H, **e**,  $J = 6.4$  Hz), 3.56 (s, 9 H's, **a**), 3.39-3.43 (m, 2 H's, **d**), 1.79 (m, 2 H, **f**) 1.66 (m, 2 H's, **c**), 0.67 (m, 2 H's, **b**), 0.09 (s, 9 H's, **i**), 0.06 ppm (s, 6 H's, **h**).  $^{13}\text{C}$  NMR ( $\text{CDCl}_3$  125 MHz):  $\delta$  73.12, 67.56, 59.33, 50.64, 33.61, 22.93, 5.39, 1.92, -0.17 ppm.  $^{29}\text{Si}$  NMR ( $\text{CDCl}_3$ , 99 MHz, 1 % w/v  $\text{Cr}(\text{acac})_3$ ):  $\delta$  7.31 (M), -13.02 (D), -42.01 ppm (T).

**3. Scaled Experimental Procedures (Table 1)**

The compounds synthesized below have been scaled as preliminary small-scale studies have shown that the Piers-Rubinsztajn reaction has been functionally tolerant to chloro, iodo, vinyl and allyl containing species.

Synthesis of (3-chloropropyl)tris(dimethylphenylsilyloxy)silane. (Table 1, Entry 1):

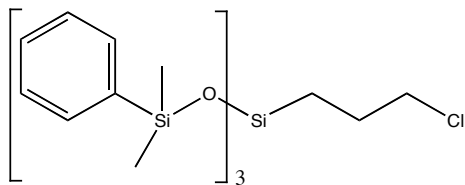

To a solution of chloropropyltriethoxysilane (0.100 g, 0.5 mmol) in dry hexane (4 ml), was added dimethylphenylsilane (0.308 g, 2.3 mmol). The mixture was stirred at room temperature for 5 min before the addition of tris(pentafluorophenyl)borane (10  $\mu\text{l}$  of a solution containing 40 mg dissolved in 1 ml of toluene,  $7.8 \times 10^{-4}$  mmol). After a 2 min induction time, rapid evolution of gas and heat from the solution occurred. The mixture was allowed to cool to room temperature before the addition of neutral alumina (1 g). The resulting solution was filtered and concentrated on a rotary evaporator. The

---

remaining solvent and excess reagents were removed *in vacuo*, affording pure chloropropyltris(dimethylphenylsilyl)silane (0.260 g, 91 % yield).

$^1\text{H}$  NMR ( $\text{CDCl}_3$ , 200 MHz):  $\delta$  7.38-7.54 (m, 6 H's, phenyl) 7.27-7.33 (m, 9 H's, phenyl), 3.36 (t, 2 H's,  $\text{O}_2\text{SiCH}_2\text{CH}_2\text{CH}_2\text{Cl}$ ,  $J = 6.8$  Hz), 1.54-1.67 (m, 2 H's,  $\text{O}_2\text{SiCH}_2\text{CH}_2\text{CH}_2\text{Cl}$ ), 0.31-0.57 (m, 2 H's,  $\text{O}_2\text{SiCH}_2\text{CH}_2\text{CH}_2\text{Cl}$ ), 0.31 (s, 18 H's,  $\text{OSi}(\text{CH}_3)_2(\text{C}_6\text{H}_5)$ ).  $^{13}\text{C}$  NMR ( $\text{CDCl}_3$  125 MHz):  $\delta$  139.3, 133.2, 129.5, 127.9, 47.7, 26.9, 12.1, 0.64 ppm.  $^{29}\text{Si}$  NMR ( $\text{CDCl}_3$ , 99 MHz, 1 % w/v  $\text{Cr}(\text{acac})_3$ ):  $\delta$  -1.98 (M), -66.90 ppm (T). HRMS (ES Positive mode):  $m/z$   $[\text{M}+\text{NH}_4^+]$  calculated = 576.2009, found = 576.2003.

Synthesis of (3-iodopropyl)tris(methylphenylvinylsilyloxy)silane (Table 1, Entry 2):

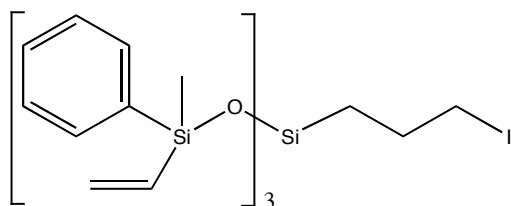

To a solution of iodopropyltrimethoxysilane (0.500 g, 1.7 mmol) in dry hexane (10 ml), was added methylphenylvinylsilane (1.14 g, 7.75 mmol). The mixture was stirred at room temperature for 5 min before the addition of tris(pentafluorophenyl)borane (20  $\mu\text{l}$  of a solution containing 40 mg dissolved in 1 ml of toluene,  $1.6 \times 10^{-3}$  mmol). After a 1 min induction time, rapid evolution of gas and heat from the solution occurred. The mixture was allowed to cool to room temperature before the addition of neutral alumina (1.5 g). The resulting solution was filtered and concentrated under reduced pressure affording pure iodopropyltris(methylphenylvinylsilyloxy)silane (1.1 g, 93% yield).

$^1\text{H}$  NMR ( $\text{CDCl}_3$ , 500 MHz):  $\delta$  7.49-7.51 (m, 6 H's, phenyl), 7.36-7.39 (m, 3 H's, phenyl), 7.29-7.32 (m, 6 H's, phenyl), 6.15-6.23 (m, 3 H,  $\text{R}_3\text{SiCHCHH}$ ), 6.02-6.06 (m, 3 H's,  $\text{R}_3\text{SiCHCHH}$ ), 5.75-5.80 (m, 3 H's,  $\text{R}_3\text{SiCHCHH}$ ), 3.03 (t, 2 H's,  $\text{O}_3\text{SiCH}_2\text{CH}_2\text{CH}_2\text{I}$ ,  $J = 7.0$  Hz), 1.71-1.77 (m, 2 H's,  $\text{O}_3\text{SiCH}_2\text{CH}_2\text{CH}_2\text{I}$ ), 0.57-0.60 (m, 2 H's,  $\text{O}_3\text{SiCH}_2\text{CH}_2\text{CH}_2\text{I}$ ), 0.371 ppm (t, 9 H's,  $\text{OSi}(\text{CH}_3)(\text{C}_6\text{H}_5)(\text{CHCH}_2)$ ,  $J = 3.5$  Hz).  $^{13}\text{C}$  NMR ( $\text{CDCl}_3$  125 MHz):  $\delta$  137.36, 136.89, 134.20, 133.74, 129.69, 127.84, 27.93, 16.16, 10.94, -1.18 ppm.  $^{29}\text{Si}$  NMR ( $\text{CDCl}_3$ , 99MHz, 1 % w/v  $\text{Cr}(\text{acac})_3$ ):  $\delta$  -13.38 (M), -67.49 ppm (T). HRMS (ES Positive mode):  $m/z$   $[\text{M}+\text{NH}_4^+]$  calculated = 704.1365, found = 704.1349.

Synthesis of tris(pentamethyldisiloxy)vinylsilane (Table 1: Entry 3):

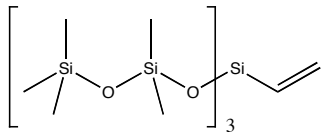

To a solution of vinyltriethoxysilane (2 g, 10.5 mmol) in dry hexane (15 ml), was added pentamethyldisiloxane (7.01 g, 47 mmol). The mixture was stirred at room temperature for 5 min before the addition of tris(pentafluorophenyl)borane (50  $\mu$ l of a solution containing 40 mg dissolved in 1 ml of toluene,  $3.9 \times 10^{-3}$  mmol). After a 5 min induction time, rapid evolution of gas and heat from the solution occurred. The mixture was allowed to cool to room temperature before the addition of neutral alumina (2.5 g). The resulting solution was filtered and concentrated under reduced pressure. The remaining solvent and excess reagents were removed *in vacuo*, affording pure tris(pentamethyldisiloxy)vinylsilane (5.06 g, 9.3 mmol, 89% yield).

$^1\text{H}$  NMR ( $\text{CDCl}_3$ , 500 MHz):  $\delta$  5.86-6.0 (m, 3 H's,  $\text{O}_3\text{SiCHCH}_2$ ), 0.09 (s, 27 H's ( $\text{H}_3\text{C}$ ) $_3\text{SiO}$ ), 0.07 ppm (s, 18 H's ( $\text{CH}_3$ ) $_2\text{SiO}_2$ ).  $^{13}\text{C}$  NMR ( $\text{CDCl}_3$  125 MHz):  $\delta$  133.97 (CH vinyl), 133.53 ( $\text{CH}_2$  vinyl), 1.95 ( $\text{Si}(\text{CH}_3)_3$ ), 1.24 ppm ( $\text{O}_2\text{Si}(\text{CH}_3)_2$ ).  $^{29}\text{Si}$  NMR ( $\text{CDCl}_3$ , 99 MHz, 1 % w/v  $\text{Cr}(\text{acac})_3$ ):  $\delta$  7.0 (M), -21.6 (D), -82.2 ppm (D). HRMS (ES Positive mode):  $m/z$  [ $\text{M}+\text{NH}_4^+$ ] calculated = 562.2180, found = 562.2153.

Synthesis of tris(1,1,1,3,5,5,5-heptamethyltrisiloxy)vinylsilane (Table 1: Entry 4):

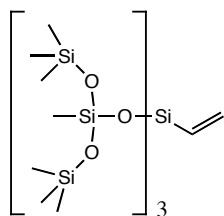

To a solution of vinyltrimethoxysilane (0.513 g, 3.5 mmol) in dry hexane (10 ml) was added 1,1,1,3,5,5,5-heptamethyltrisiloxane (3.85 g, 17.3 mmol). The mixture was stirred at room temperature for 5 min before the addition of tris(pentafluorophenyl)borane (40  $\mu$ l of a prepared solution containing 40 mg dissolved in 1 ml of toluene,  $3.1 \times 10^{-3}$  mmol). After a 3 min induction time, rapid evolution of gas and heat from the solution occurred. The mixture was allowed to cool to room temperature before the addition of neutral alumina (1 g). The resulting solution was filtered and concentrated under reduced

pressure. The remaining solvent and excess reagents were removed *in vacuo*, affording pure tris(1,1,1,3,5,5,5-heptamethyltrisiloxy)vinylsilane (2.40 g, 89.5% yield).

$^1\text{H}$  NMR ( $\text{CDCl}_3$ , 500 MHz):  $\delta$  5.89-5.98 (m, 3 H's,  $\text{O}_3\text{SiCHCH}_2$ ), 0.09 (s, 54 H's ( $\text{H}_3\text{C}$ ) $_3\text{SiO}$ ), 0.05 ppm (s, 9 H's ( $\text{CH}_3$ ) $_3\text{SiO}_3$ );  $^{13}\text{C}$  NMR:  $\delta$  ( $\text{CDCl}_3$  125 MHz) 134.75 (CH vinyl), 133.74 ( $\text{CH}_2$  vinyl), 2.48 ( $\text{Si}(\text{CH}_3)_3$ ), -1.33 ppm ( $\text{O}_3\text{SiCH}_3$ );  $^{29}\text{Si}$  NMR ( $\text{CDCl}_3$ , 99 MHz, 1 % w/v  $\text{Cr}(\text{acac})_3$ ):  $\delta$  7.16 (M), -66.43 (D), -84.02 ppm (D). HRMS (ES Positive mode):  $m/z$  [ $\text{M}+\text{NH}_4^+$ ] calculated = 784.2743, found = 784.2771.

Synthesis of allyltris(pentamethyldisiloxy)silane (Table 1: Entry 5):

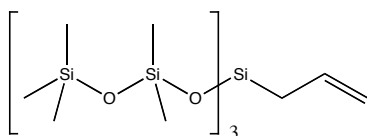

To a solution of allyltriethoxysilane (0.500 g, 2.4 mmol) in dichloromethane (10 ml), was added pentamethyldisiloxane (1.63 g, 11 mmol). The mixture was stirred at room temperature for 5 min before the addition of tris(pentafluorophenyl)borane (20  $\mu\text{l}$  of a solution containing 40 mg dissolved in 1 ml of toluene,  $1.6 \times 10^{-3}$  mmol). After a 3 min induction time, rapid evolution of gas and heat from the solution occurred. The mixture was allowed to cool to room temperature before the addition of neutral alumina (1 g). The resulting solution was filtered and concentrated on a rotary evaporator. The remaining solvent and excess reagents were removed *in vacuo*, affording pure allyltris(pentamethyldisiloxy)silane (1.18 g, 87% yield).

$^1\text{H}$  NMR ( $\text{CDCl}_3$ , 500 MHz):  $\delta$  5.74-5.83 (m, 1 H,  $\text{O}_3\text{SiCH}_2\text{CHCH}_2$ ), 4.93 (dd, 1 H,  $\text{O}_3\text{SiCH}_2\text{CHCHH}$ ,  $J = 2.0, 17.0$  Hz), 4.87 (dd, 1 H,  $\text{O}_3\text{SiCH}_2\text{CHCHH}$ ,  $J = 2.0, 10.0$  Hz), 1.55 (d, 2 H's  $\text{O}_3\text{SiCH}_2\text{CHCH}_2$ ,  $J = 7.5$  Hz), 0.09 (s, 27 H's, ( $\text{CH}_3$ ) $_3\text{SiO}$ ), 0.06 ppm (s, 18 H's, ( $\text{CH}_3$ ) $_2\text{SiO}$ ).  $^{13}\text{C}$  NMR ( $\text{CDCl}_3$  125 MHz):  $\delta$  133.78 ( $\text{O}_3\text{SiCH}_2\text{CHCH}_2$ ), 114.31 ( $\text{O}_3\text{SiCH}_2\text{CHCH}_2$ ), 22.3 ( $\text{O}_3\text{SiCH}_2\text{CHCH}_2$ ), 1.97 ( $\text{CH}_3$ ) $_3\text{SiO}$ ), 1.24 ppm ( $\text{CH}_3$ ) $_2\text{SiO}_2$ ).  $^{29}\text{Si}$  NMR ( $\text{CDCl}_3$ , 99 MHz, 1 % w/v  $\text{Cr}(\text{acac})_3$ ):  $\delta$  6.95 (M), -21.96 (D), -74.08 ppm (T). HRMS (ES Positive mode):  $m/z$  [ $\text{M}+\text{NH}_4^+$ ] calculated = 576.2336, found = 576.2369

Synthesis of allyltris(1,1,1,3,5,5,5-heptamethyltrisiloxy)silane (Table 1: Entry 6):

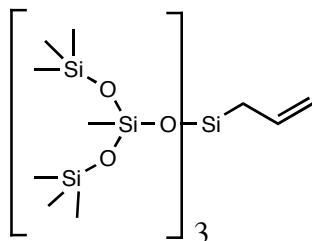

To a solution of allyltrisethoxysilane (0.500 g, 2.4 mmol) in dry hexane (10 ml), was added 1,1,1,3,5,5,5-heptamethyltrisiloxane (2.72 g, 12 mmol). The mixture was stirred at room temperature for 5 min before the addition of tris(pentafluorophenyl)borane (65  $\mu$ l of a solution containing 40 mg dissolved in 1 ml of toluene,  $5.1 \times 10^{-3}$  mmol). After a 5 min induction time, rapid evolution of gas and heat from the solution occurred. The mixture was allowed to cool to room temperature before the addition of neutral alumina (1 g). The resulting solution was filtered and concentrated under reduced pressure. The remaining solvent and excess reagents were removed *in vacuo*, affording pure allyltris(1,1,1,3,5,5,5-heptamethyltrisiloxy)silane (1.78 g, 94% yield).

$^1\text{H}$  NMR ( $\text{CDCl}_3$ , 500 MHz):  $\delta$  5.78-5.86 (m, 1 H,  $\text{O}_3\text{SiCH}_2\text{CHCH}_2$ ), 4.95 (dd, 1 H,  $\text{O}_3\text{SiCH}_2\text{CHCHH}$ ,  $J = 1.8, 17.0$  Hz), 4.87 (dd, 1 H,  $\text{O}_3\text{SiCH}_2\text{CHCHH}$ ,  $J = 1.8, 10.5$  Hz), 1.57 (d, 2 H's,  $\text{O}_3\text{SiCH}_2\text{CHCH}_2$ ,  $J = 7.5$  Hz), 0.10 (s, 54 H's,  $(\text{CH}_3)_3\text{SiO}$ ), 0.04 (s, 9 H's,  $\text{CH}_3\text{SiO}_3$ ).  $^{13}\text{C}$  NMR ( $\text{CDCl}_3$ , 125 MHz):  $\delta$  133.63 ( $\text{O}_3\text{SiCH}_2\text{CHCH}_2$ ), 114.48 ( $\text{O}_3\text{SiCH}_2\text{CHCH}_2$ ), 22.04 ( $\text{O}_3\text{SiCH}_2\text{CHCH}_2$ ), 1.91 ( $(\text{CH}_3)_3\text{SiO}$ ), -1.94 ppm ( $\text{CH}_3\text{SiO}_3$ ).  $^{29}\text{Si}$  NMR ( $\text{CDCl}_3$ , 99 MHz, 1 % w/v  $\text{Cr}(\text{acac})_3$ ):  $\delta$  7.14 (M), -66.57 (D), -75.67 ppm (D). HRMS (ES Positive mode):  $m/z$   $[\text{M}+\text{NH}_4^+]$  calculated = 798.2900, found = 798.2928.

#### Synthesis of tetrakis(vinyltetramethyldisiloxy)silane (Table 1: Entry 7):

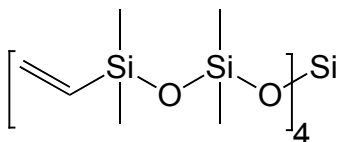

To a solution of tetraethyl orthosilicate (0.200 g, 0.96 mmol) in dry hexane (5 ml), was added vinyltetramethyldisiloxane (0.85 g, 5.28 mmol). The mixture was stirred at room temperature for 5 min before the addition of tris(pentafluorophenyl)borane (10  $\mu$ l of a solution containing 40 mg dissolved in 1 ml of toluene,  $7.81 \times 10^{-4}$  mmol). After a 2 min induction time, rapid evolution of gas and heat from the solution occurred. The mixture



was allowed to cool to room temperature before the addition of neutral alumina (1 g). The resulting solution was filtered and concentrated under reduced pressure. The remaining solvent and excess reagents were removed *in vacuo*, affording pure tetrakis(vinyltetramethyldisiloxy)silane (0.520 g, 75% yield).

$^1\text{H}$  NMR ( $\text{CDCl}_3$ , 500 MHz):  $\delta$  6.13 (dd, 4 H's,  $\text{R}_3\text{SiCHCHH}$ ,  $J = 15.0, 20.5$  Hz), 5.93 (dd, 4 H's,  $\text{R}_3\text{SiCHCHH}$ ,  $J = 4.0, 15.0$  Hz), 5.74 (dd, 4 H's,  $\text{R}_3\text{SiCHCHH}$ ,  $J = 4.0, 20.5$  Hz), 0.166 (s, 24H's  $\text{O}(\text{H}_3\text{C})_2\text{Si}(\text{CHCH}_2)$ ), 0.09 ppm (s, 24 H's  $(\text{CH}_3)_2\text{SiO}_2$ ).  $^{13}\text{C}$  NMR ( $\text{CDCl}_3$  125 MHz):  $\delta$  139.47 (CH vinyl), 131.82 ( $\text{CH}_2$  vinyl), 1.17 ( $\text{SiCH}_3$ ), 0.45 ppm ( $\text{SiCH}_3$ ).  $^{29}\text{Si}$  NMR ( $\text{CDCl}_3$ , 99 MHz, 1 % w/v  $\text{Cr}(\text{acac})_3$ ):  $\delta$  -4.34 (M), -20.95 (D), -110.18 ppm (D). HRMS (ES Positive mode):  $m/z$   $[\text{M}+\text{NH}_4^+]$  calculated = 746.2555, found = 746.2564.

Synthesis of tetrakis(methylphenylvinylsiloxy)silane (Table 1: Entry 8):

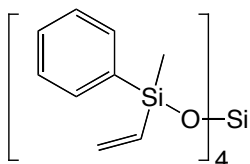

To a solution of tetramethyl orthosilicate (0.500 g, 3.3 mmol) in dry hexane (15 ml), was added methylphenylvinylsilane (2.92 g, 19.7 mmol). The mixture was stirred at room temperature for 5 min before the addition of tris(pentafluorophenyl)borane (25  $\mu\text{l}$  of a solution containing 40 mg dissolved in 1 ml of toluene,  $1.95 \times 10^{-3}$  mmol). After a 2.5 min induction time, rapid evolution of gas and heat from the solution occurred. The mixture was allowed to cool to room temperature before the addition of neutral alumina (1.5 g). The resulting solution was filtered and concentrated on a rotary evaporator. The remaining solvent and excess reagents were removed *in vacuo*, affording pure tetrakis(methylphenylvinylsiloxy)silane (1.98 g, 2.9 mmol, 89 % yield).

$^1\text{H}$  NMR ( $\text{CDCl}_3$ , 500 MHz):  $\delta$  7.49-7.51 (d, 8 H's,  $J = 7.5$  Hz, phenyl), 7.36-7.39 (m, 4 H's, phenyl), 7.26-7.29 (m, 8 H's, phenyl), 6.16 (dd, 4 H's,  $\text{R}_3\text{SiCHCHH}$ ,  $J = 14.5, 20.0$  Hz), 6.0 (dd, 4 H's,  $\text{R}_3\text{SiCHCHH}$ ,  $J = 3.5, 14.5$  Hz), 5.76 (dd, 4 H's,  $\text{R}_3\text{SiCHCHH}$ ,  $J = 3.5, 20$  Hz), 0.34 ppm (s, 12 H's,  $\text{OSi}(\text{CH}_3)(\text{C}_6\text{H}_5)(\text{CHCH}_2)$ ).  $^{13}\text{C}$  NMR ( $\text{CDCl}_3$  125 MHz):  $\delta$  137.34, 136.86, 133.97, 133.80, 129.48, 127.67, -1.37 ppm.  $^{29}\text{Si}$  NMR ( $\text{CDCl}_3$ , 99 MHz,

1 % w/v Cr(acac)<sub>3</sub>:  $\delta$  -12.84 (M), -106.12 ppm (Q). HRMS (ES Positive mode):  $m/z$  [M+NH<sub>4</sub><sup>+</sup>] calculated = 698.2430, found = 698.2447.

#### Synthesis of (3-azidopropyl)tris(dimethylphenylsiloxy)silane 6:

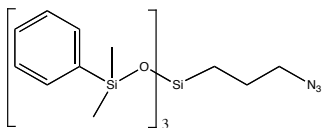

To a 10 ml round bottom flask equipped with a magnetic stir bar was added a solution of (3-chloropropyl)tris(dimethylphenylsiloxy)silane **5** (0.500 g, 0.89 mmol) in anhydrous DMF (2.5 ml). To the solution was added sodium azide (0.116 g, 1.78 mmol). The mixture was then allowed to stir overnight at 90 °C. To the mixture was added 40 ml of water and extracted with 25 ml of hexane. The aqueous layer was washed once more to maximize product recovery. The organic layers were combined and dried over magnesium sulfate (10 g). The resulting solution was filtered and concentrated under reduced pressure affording pure pale yellow (3-azidopropyl)tris(dimethylphenylsiloxy)silane **6** (0.489 g, 97% yield).

<sup>1</sup>H NMR (CDCl<sub>3</sub>, 200 MHz):  $\delta$  7.48-7.53 (m, 6 H's, phenyl) 7.29-7.38 (m, 9 H's, , phenyl), 3.04 (t, 2 H's, O<sub>3</sub>SiCH<sub>2</sub>CH<sub>2</sub>CH<sub>2</sub>N<sub>3</sub>,  $J$  = 7.1 Hz), 1.45-1.53 (m, 2 H's, O<sub>3</sub>SiCH<sub>2</sub>CH<sub>2</sub>CH<sub>2</sub>N<sub>3</sub>), 0.43-0.52 (m, 2 H's, O<sub>3</sub>SiCH<sub>2</sub>CH<sub>2</sub>CH<sub>2</sub>N<sub>3</sub>), 0.30 (s, 18 H's, OSi(CH<sub>3</sub>)<sub>2</sub>(C<sub>6</sub>H<sub>5</sub>)). <sup>13</sup>C NMR (CDCl<sub>3</sub> 125 MHz):  $\delta$  139.3, 133.1, 129.5, 127.9, 53.9, 23.1, 11.6, 0.62 ppm. <sup>29</sup>Si NMR (CDCl<sub>3</sub>, 99 MHz, 1 % w/v Cr(acac)<sub>3</sub>):  $\delta$  -1.97 (M), -66.94 ppm (T). HRMS (ES Positive mode):  $m/z$  [M+NH<sub>4</sub><sup>+</sup>] calculated = 583.2412, found = 583.2407.

#### Synthesis of 7:

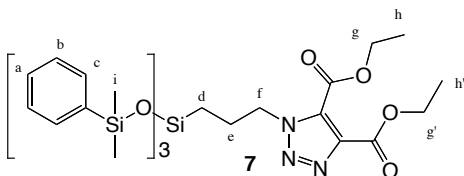

To a 5 ml round bottom flask equipped with a magnetic stir bar and previously prepared (3-azidopropyl)tris(dimethylphenylsiloxy)silane (0.250 g, 0.44 mmol), was added diethyl acetylenedicarboxylate (0.13 g, 0.88 mmol). The mixture was then stirred at room

temperature overnight. Once completed, excess starting materials were removed under reduced pressure readily affording pure **7** (0.324 g, 99.6% yield)

$^1\text{H}$  NMR ( $\text{CDCl}_3$ , 500 MHz):  $\delta$  7.46-7.48 (m, 6 H's, **c**) 7.34-7.37 (m, 3 H's, **a**), 7.29-7.31 (m, 6 H's, **b**), 4.43 (q, 2 H's, **g**,  $J = 7.0$  Hz), 4.39 (t, 2 H's, **f**,  $J = 7.5$  Hz), 4.35 (q, 2 H's, **g'**,  $J = 7.0$  Hz), 1.77 (m, 2 H's, **c**), 1.42 (t, 3 H's, **h**,  $J = 7.0$  Hz), 1.33 (t, 3 H's, **h'**,  $J = 7.0$  Hz), 0.41-0.44 (m, 2 H's, **d**), 0.28 ppm (s, 18 H's, **i**).  $^{13}\text{C}$  NMR ( $\text{CDCl}_3$  125 MHz):  $\delta$  160.42, 158.58, 140.22, 139.07, 133.05, 129.48, 127.81, 62.78, 61.87, 52.87, 24.57, 14.29, 13.95, 11.41, 0.50 ppm.  $^{29}\text{Si}$  NMR ( $\text{CDCl}_3$ , 99 MHz, 1 % w/v  $\text{Cr}(\text{acac})_3$ ):  $\delta$  -1.68 (M), -67.75 ppm (T). HRMS (ES Positive mode):  $m/z$  [ $\text{M}^+$ ] calculated = 736.2726, found = 736.2702.

#### Synthesis of **8**:

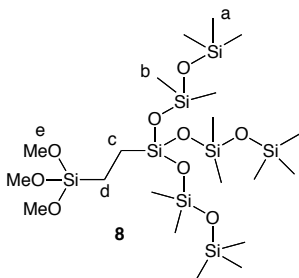

In a round bottom flask equipped with a stir bar and water jacket condenser with drying tube (Drierite desiccant) was dissolved tris(pentamethyldisiloxy)vinylsilane (0.250 g, 0.46 mmol) in toluene (5 ml). Trimethoxysilane (0.073 g, 0.59 mmol) was then added, followed by Karstedt's platinum complex (15  $\mu\text{l}$ ; 2% solution in xylenes). The reaction flask was then immersed in an oil bath at 80  $^\circ\text{C}$ . The reaction was allowed to proceed for 18 h, at which time activated charcoal was added (0.25 g), and the resulting solution was stirred for an additional 2 h. The crude reaction mixture was filtered over celite, and residual solvent and excess hydrosilane was removed *in vacuo*, affording **8**. (0.214 g, 70% yield)

$^1\text{H}$  NMR ( $\text{CDCl}_3$ , 600 MHz):  $\delta$  3.56 (s, 9 H's, **e**), 0.639 (m, 2 H's, **c**), 0.55 (m, 2 H's, **d**), 0.09 (s, 27 H's, **f**), 0.60 ppm (s, 18 H's, **b**).  $^{13}\text{C}$  NMR ( $\text{CDCl}_3$ , 150 MHz):  $\delta$  50.70, 5.39, 1.97, 1.30, 0.95 ppm.  $^{29}\text{Si}$  NMR ( $\text{CDCl}_3$ , 99 MHz, 1 % w/v  $\text{Cr}(\text{acac})_3$ ):  $\delta$  -6.90 (M), -22.12 (D), -41.89 (T), -69.16 ppm (T)

### 3. Spectroscopic Data from NMR experiments

#### Mercaptopropyltrimethoxysilane + pentamethyldisiloxane

$^1\text{H}$  NMR

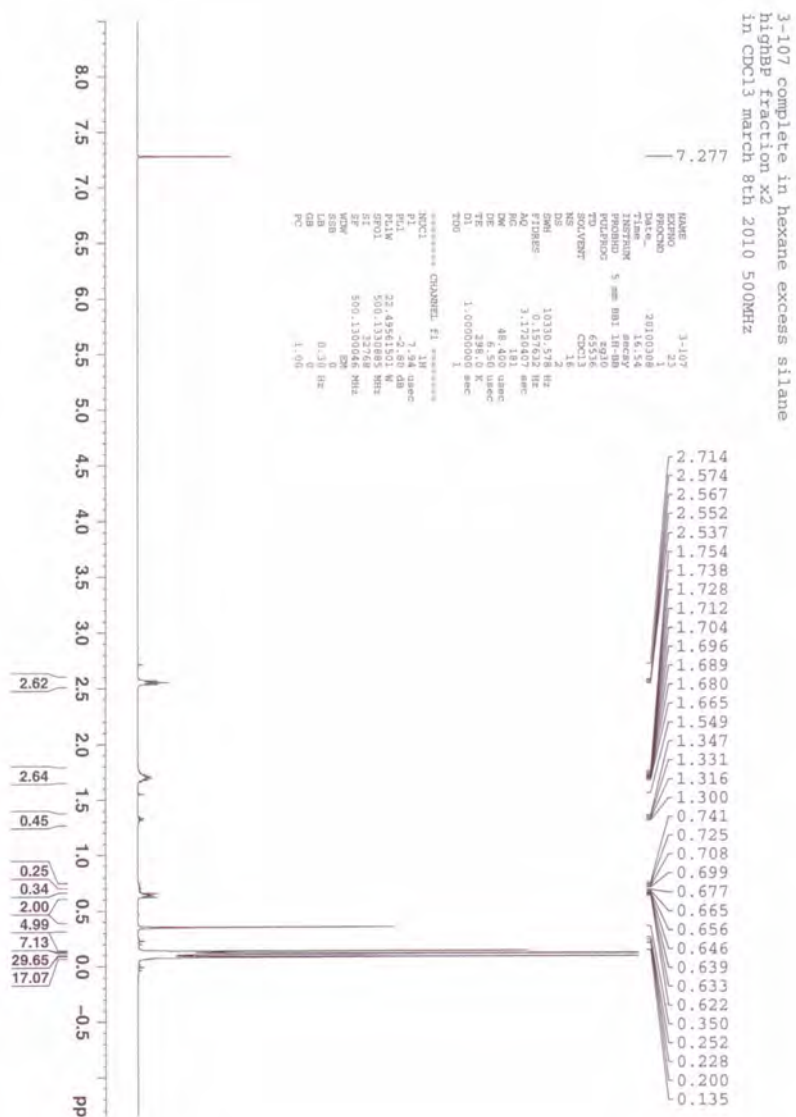

$^{13}\text{C}$  NMR

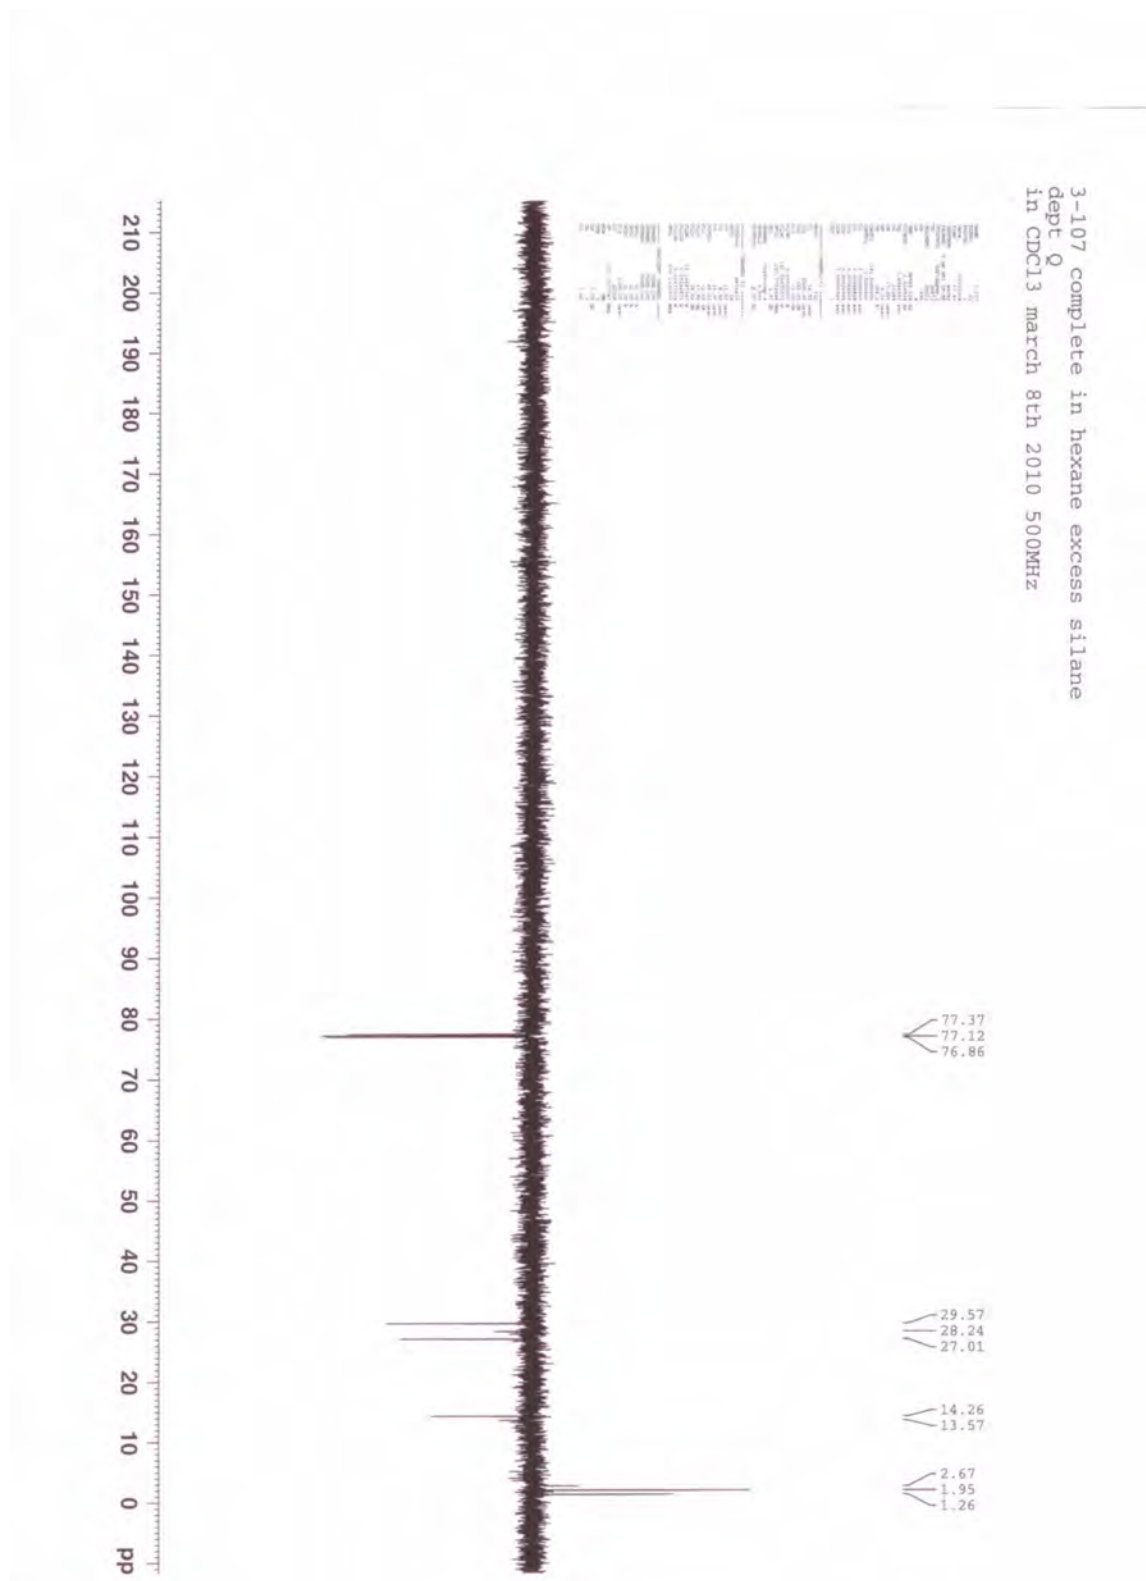

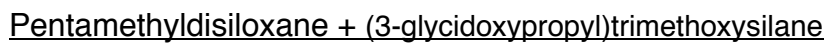

$^{13}\text{C}$  NMR

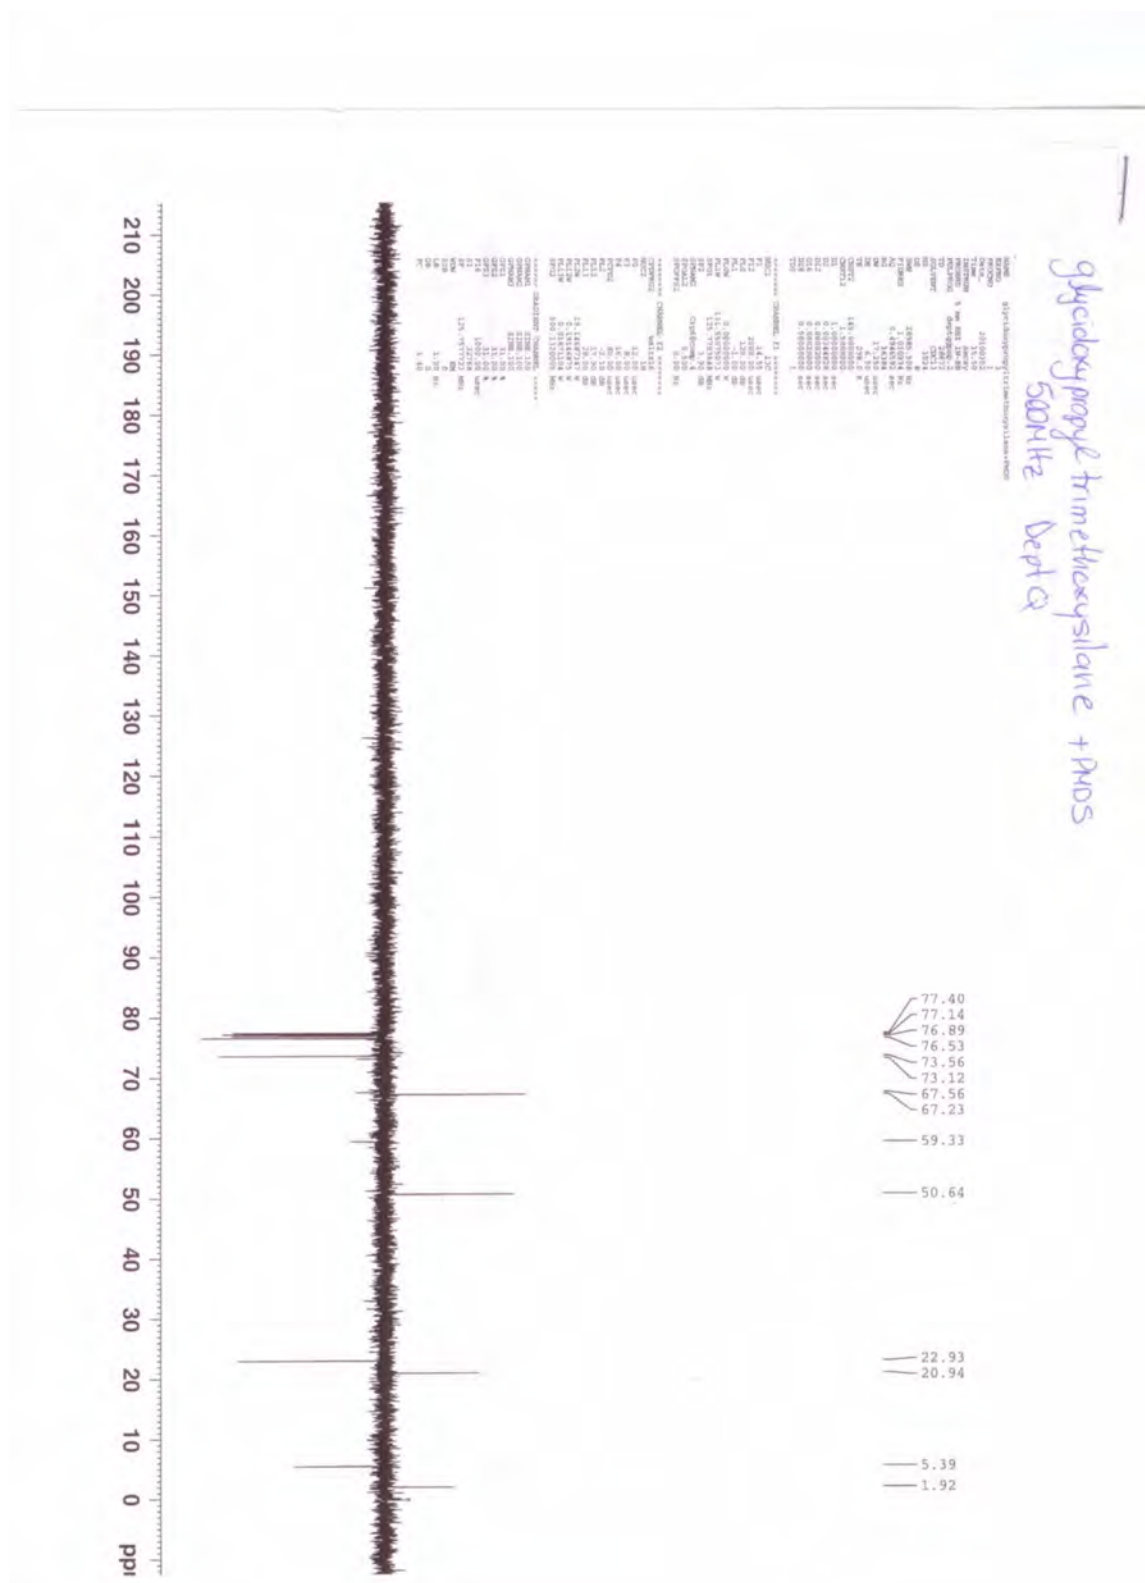

<sup>29</sup>Si NMR

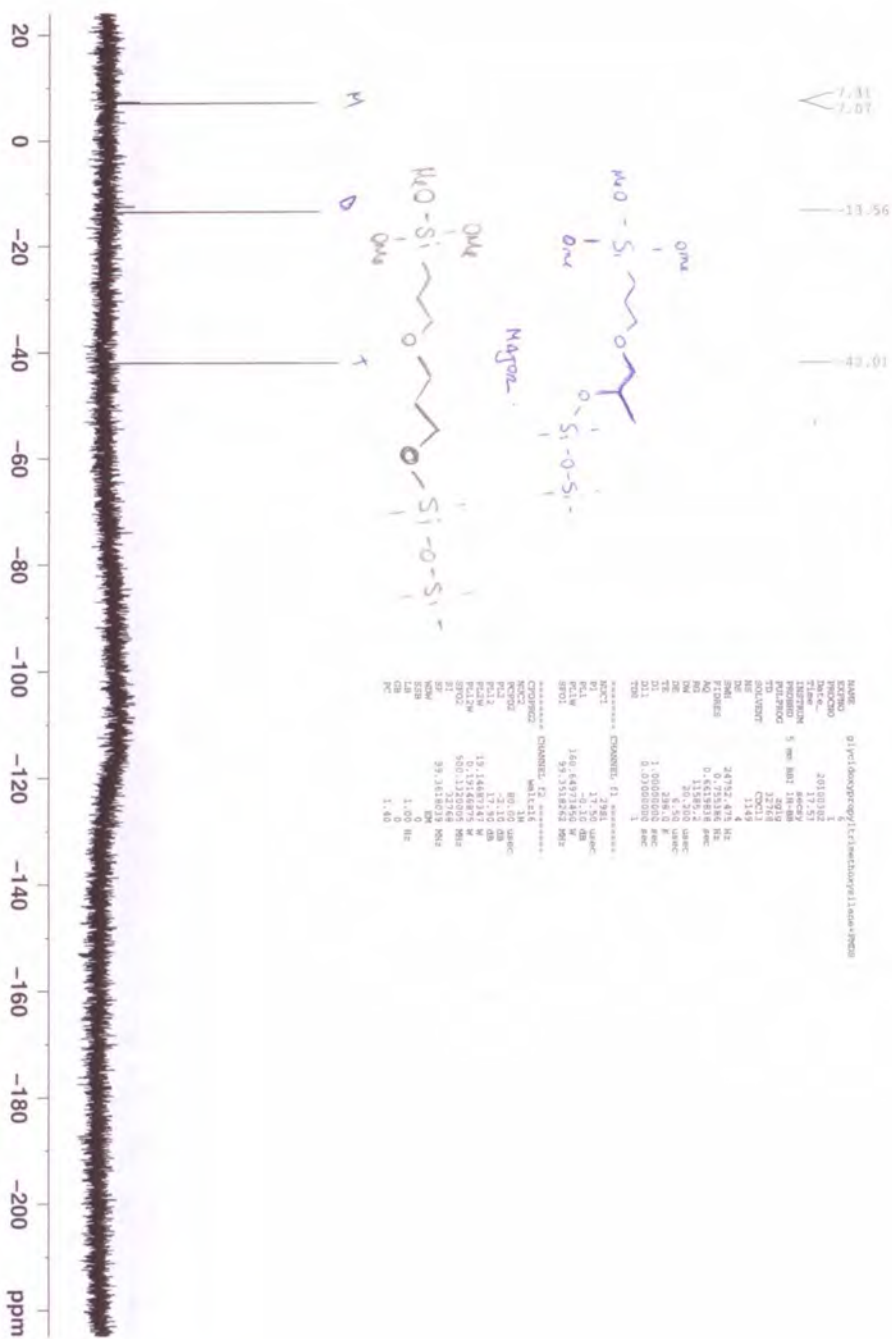



## 4. Spectroscopic Data from Table 1

### Table 1 Entry #1:

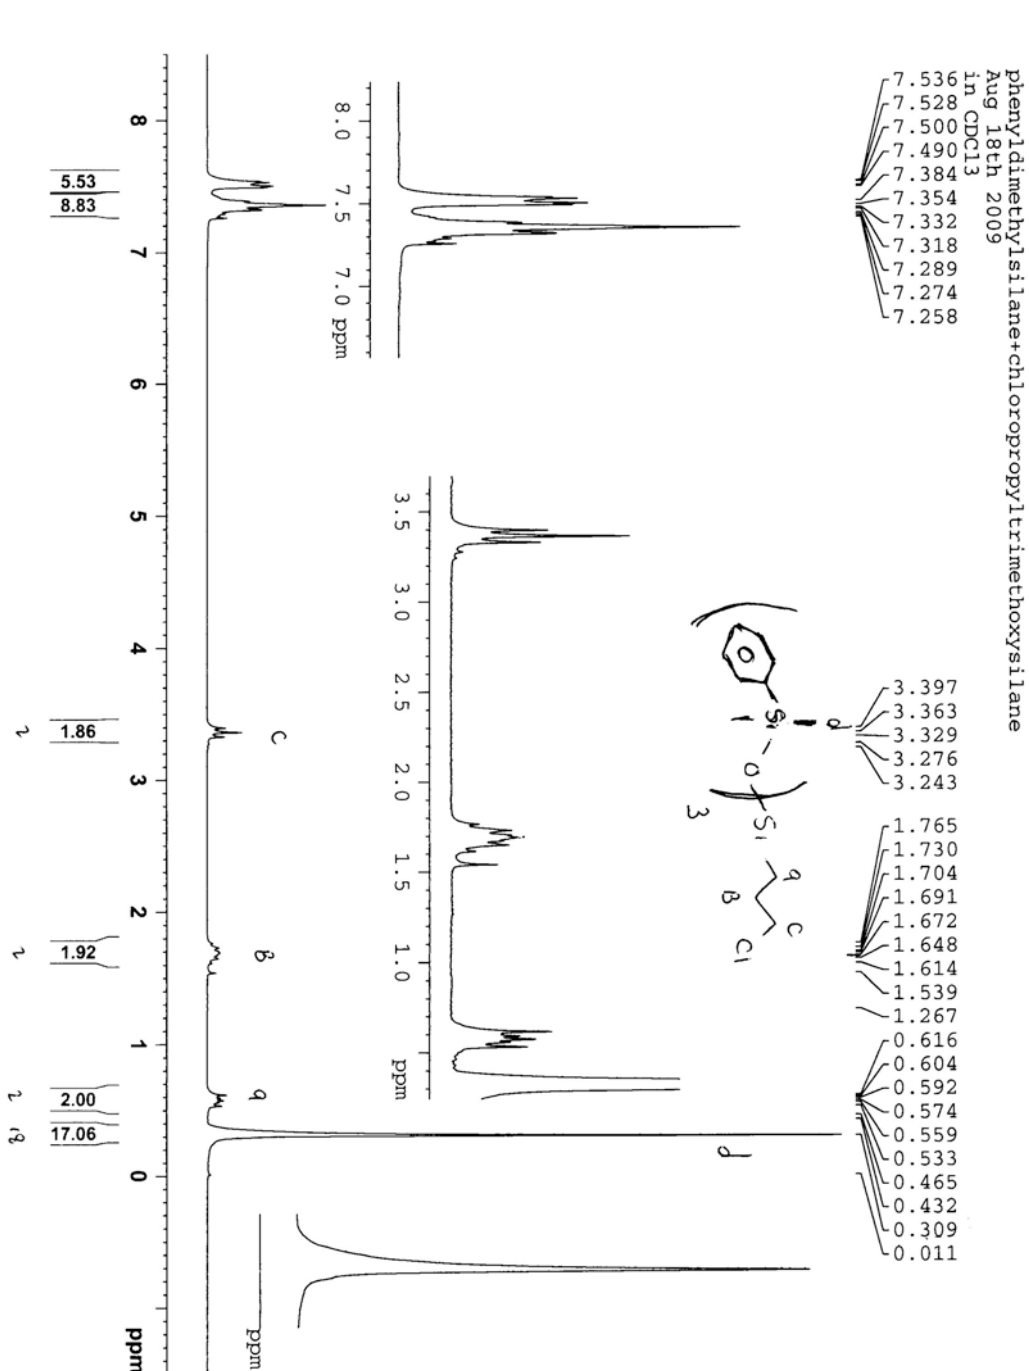

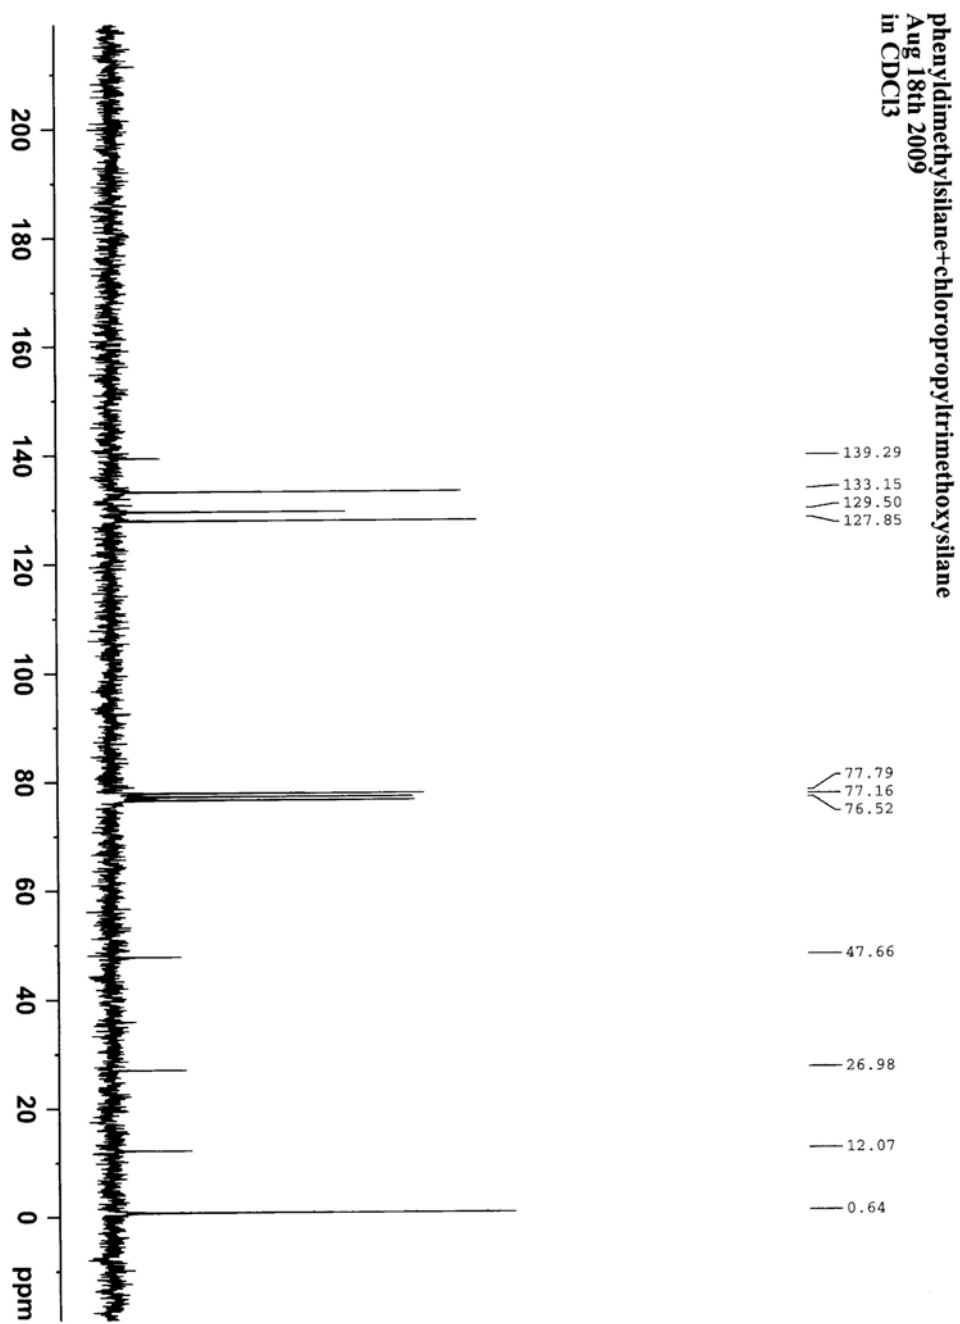

phenyldimethylsilane+chloropropyltrimethoxysilane  
cdcl3 august 17th 2009 Silicon 29 NMR

500 MHz

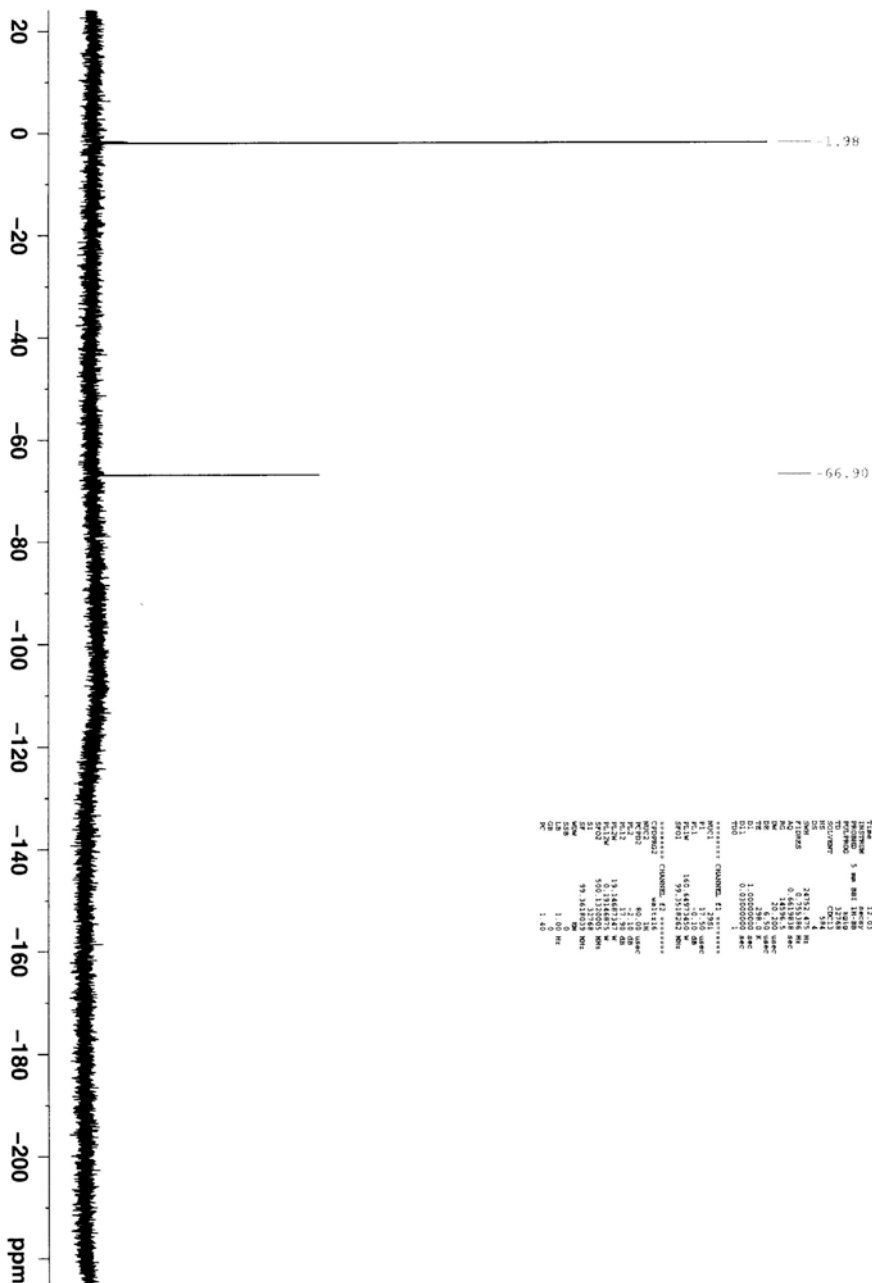

**Table 1 Entry #2:**

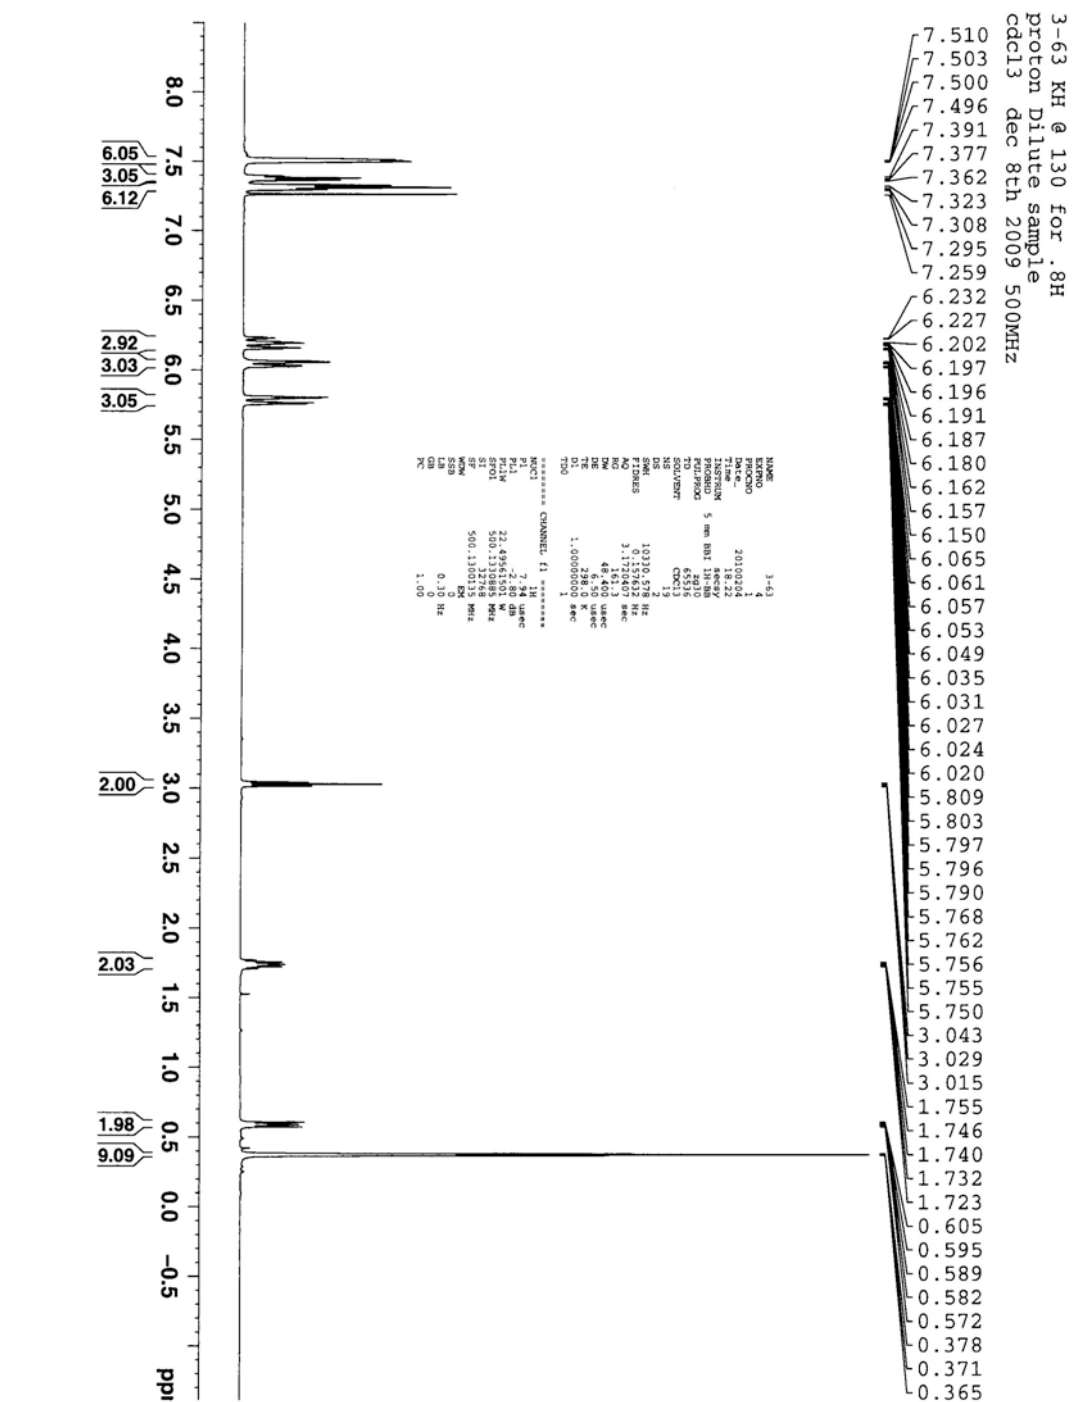

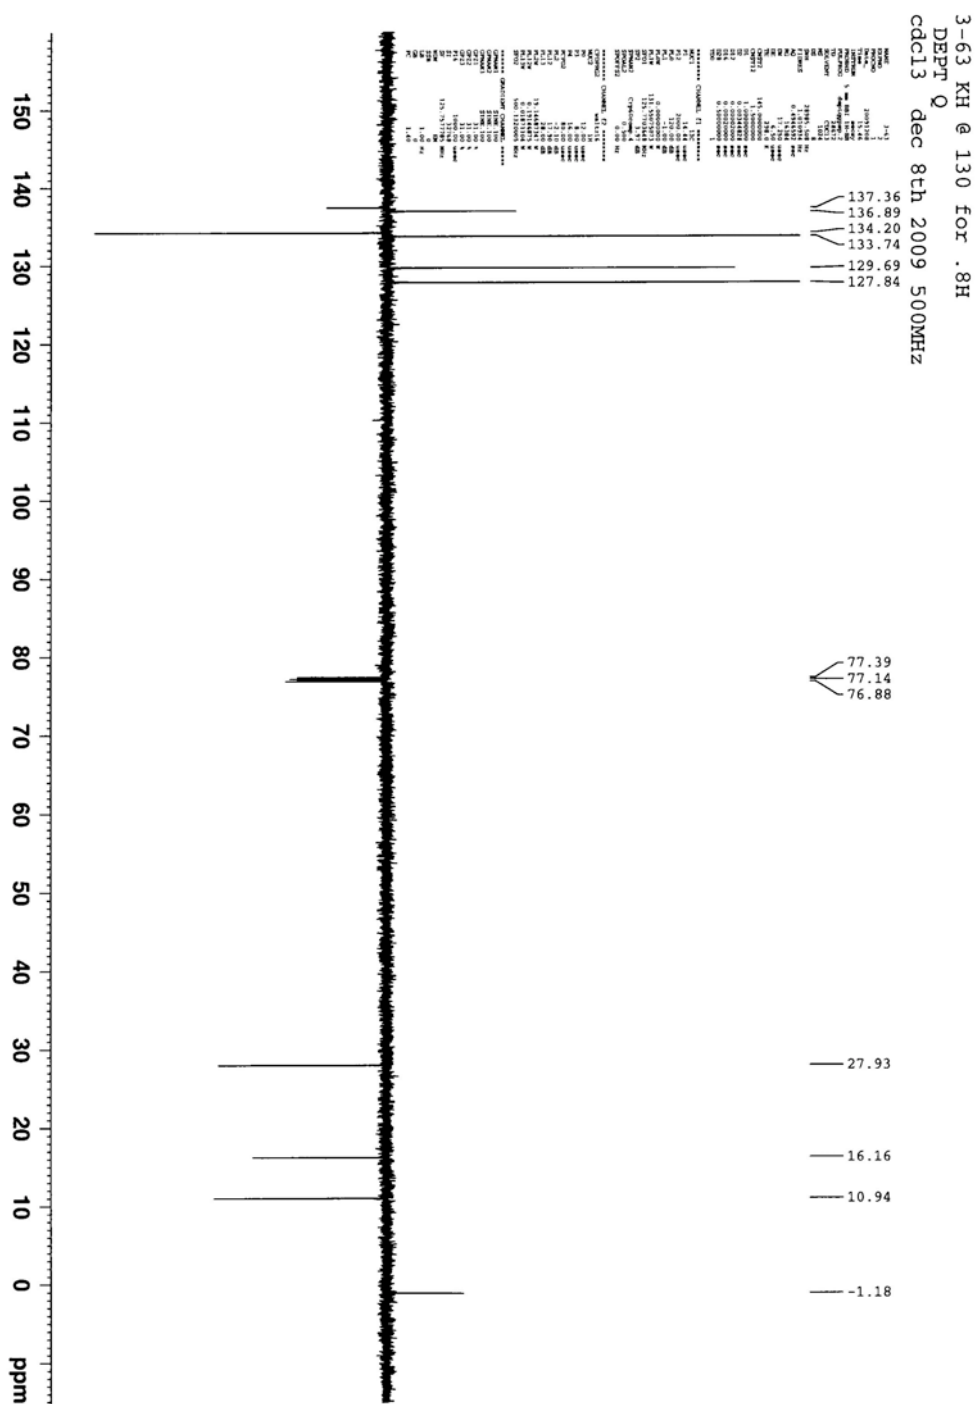

3-63 KH @ 130 for .8H  
Silicon  
cdcl3 dec 8th 2009 500MHz

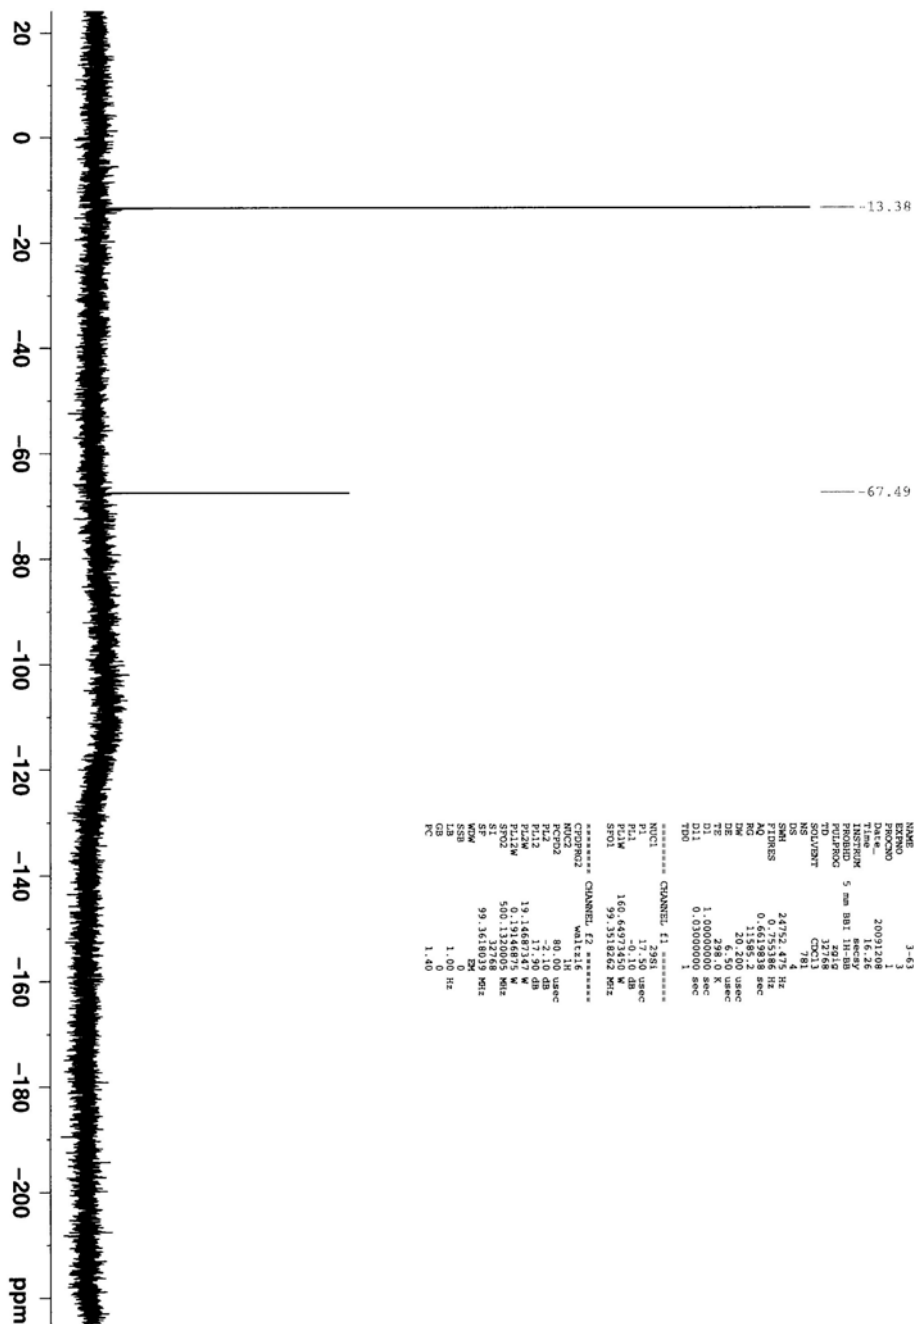

**Table 1 Entry #3:**

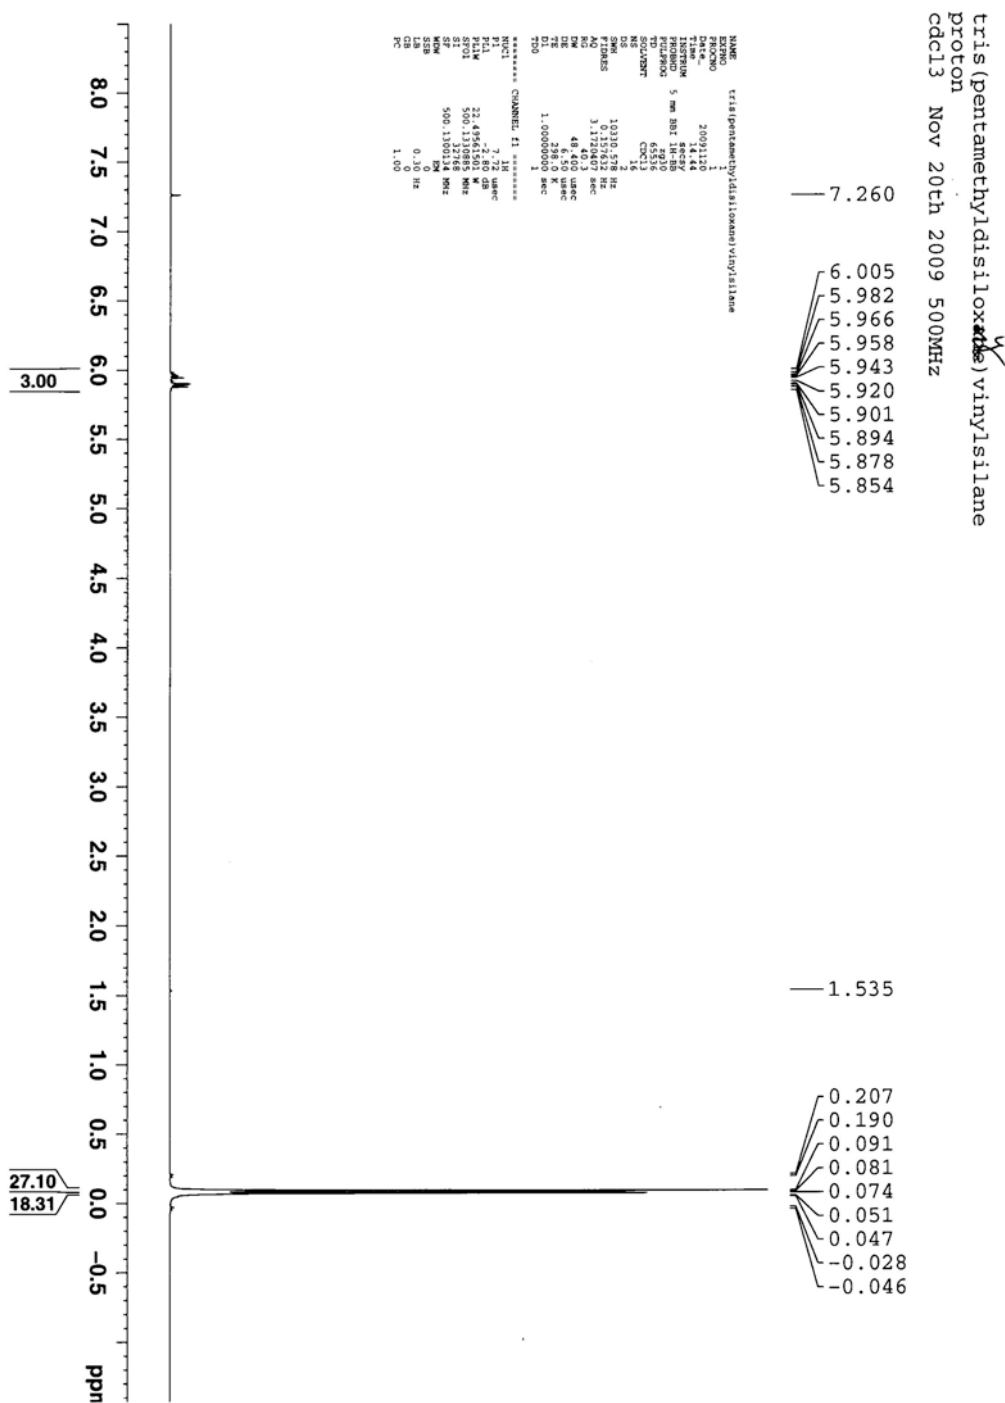

cdcl3 Nov 20th 2009 500MHz

$$\leq \begin{matrix} 133.97 \\ 133.53 \end{matrix}$$

$\begin{array}{l} \diagup 77.40 \\ \text{---} 77.15 \\ \diagdown 76.89 \end{array}$

$$\begin{aligned} &\geq 1.95 \\ &\geq 1.24 \end{aligned}$$
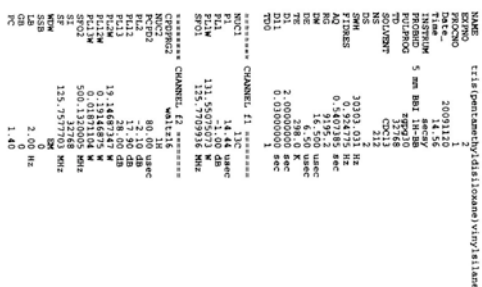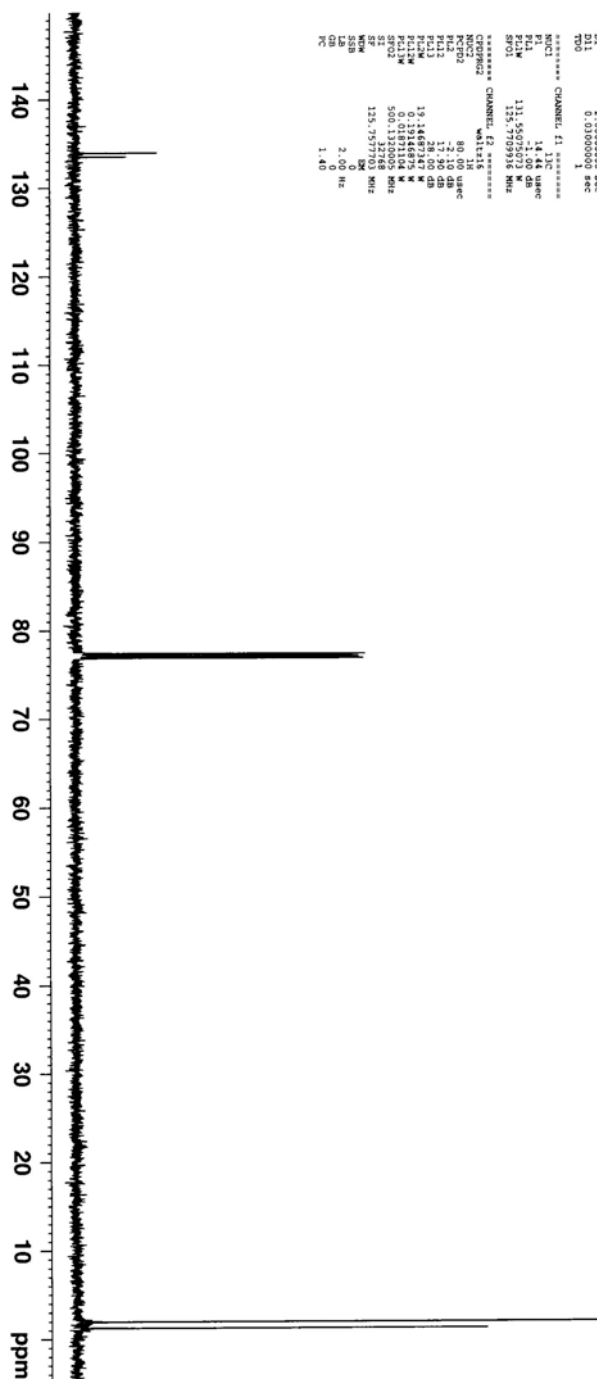



tris(pentamethyldisiloxane)vinylsilane  
silicon  
cdcl3 Nov 20th 2009 500MHz

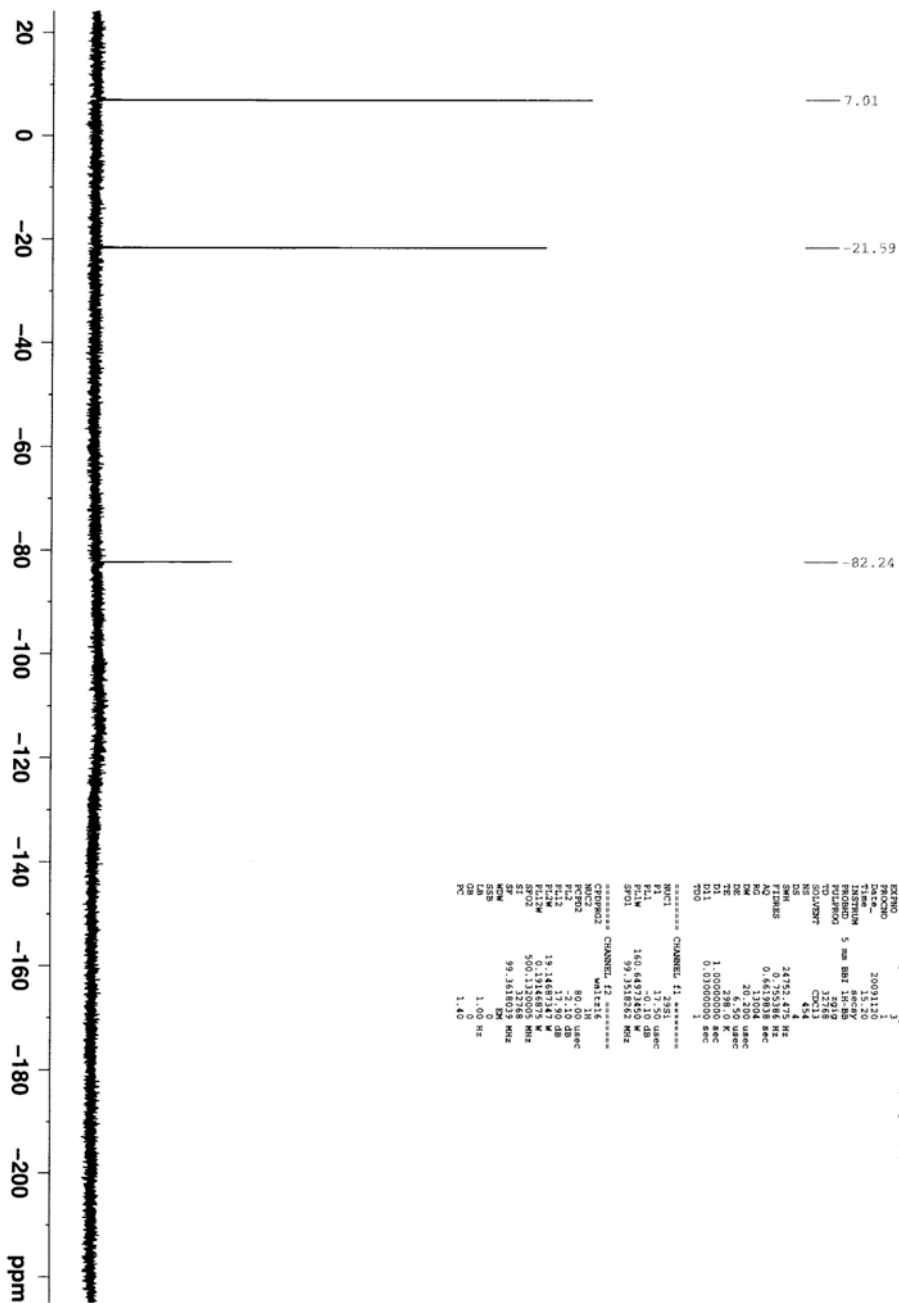

```
NAME tris(pentamethyldisiloxane)vinylsilane
EXPNO 1
PROCNO 1
PROC2 1
DATE_ 20091120
TIME 17.42
INSTRUM spect
PROBHD 5 mm BBO 1H/13
PULPROG zgpg30
TOC 1
TD 65536
SOLVENT cdcl3
NS 4096
DS 4
SWH 24752.475 Hz
FIDRES 0.755186 Hz
AQ 0.6462580 sec
RG 655
GB 0
PC 1.00
TE 298.0 K
DE 0.0000000 sec
D1 0.01000000 sec
D11 0.01000000 sec
TDO 1

===== CHANNEL f1 =====
NUC1 13C
P1 12.00
PL1 0.00
PCPD 1.00
NUC2 1H
P2 12.00
PL2 0.00
PCPD 1.00
SFO1 99.995852 MHz

===== CHANNEL f2 =====
NAME tris(pentamethyldisiloxane)vinylsilane
EXPNO 1
PROCNO 1
PROC2 1
DATE_ 20091120
TIME 17.42
INSTRUM spect
PROBHD 5 mm BBO 1H/13
PULPROG zgpg30
TOC 1
TD 65536
SOLVENT cdcl3
NS 4096
DS 4
SWH 24752.475 Hz
FIDRES 0.755186 Hz
AQ 0.6462580 sec
RG 655
GB 0
PC 1.00
TE 298.0 K
DE 0.0000000 sec
D1 0.01000000 sec
D11 0.01000000 sec
TDO 1

===== CHANNEL f3 =====
NAME tris(pentamethyldisiloxane)vinylsilane
EXPNO 1
PROCNO 1
PROC2 1
DATE_ 20091120
TIME 17.42
INSTRUM spect
PROBHD 5 mm BBO 1H/13
PULPROG zgpg30
TOC 1
TD 65536
SOLVENT cdcl3
NS 4096
DS 4
SWH 24752.475 Hz
FIDRES 0.755186 Hz
AQ 0.6462580 sec
RG 655
GB 0
PC 1.00
TE 298.0 K
DE 0.0000000 sec
D1 0.01000000 sec
D11 0.01000000 sec
TDO 1
```

**Table 1 Entry #4:**

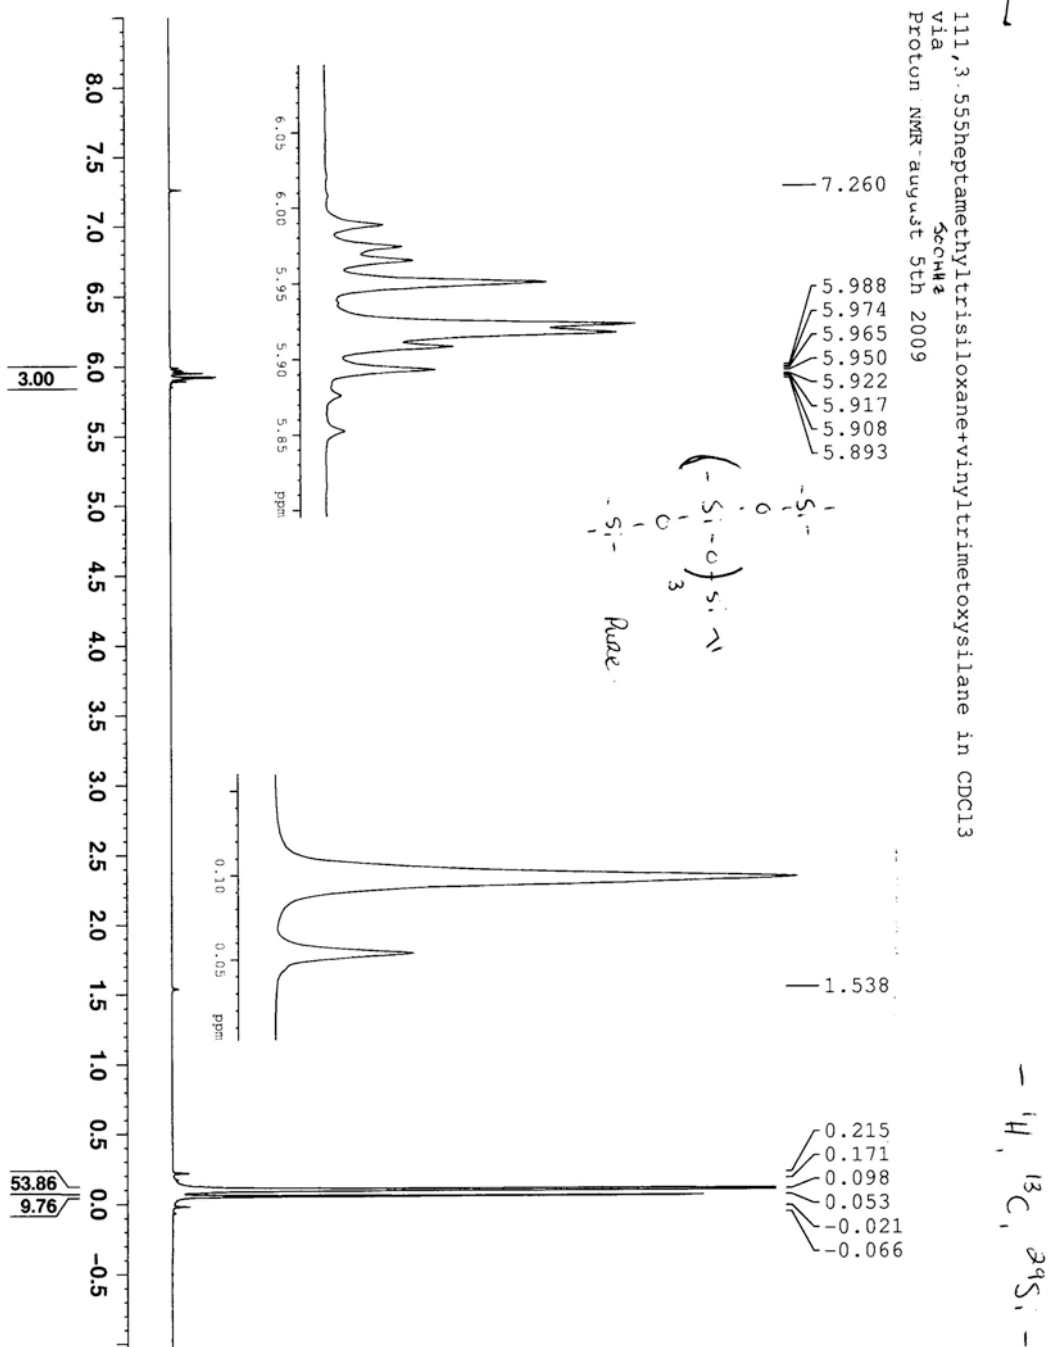

1,1,3,5,5heptamethyltrisiloxane+vinyltrimetoxysilane in CDCl<sub>3</sub> purified  
CARBON 13 august 5th 2009

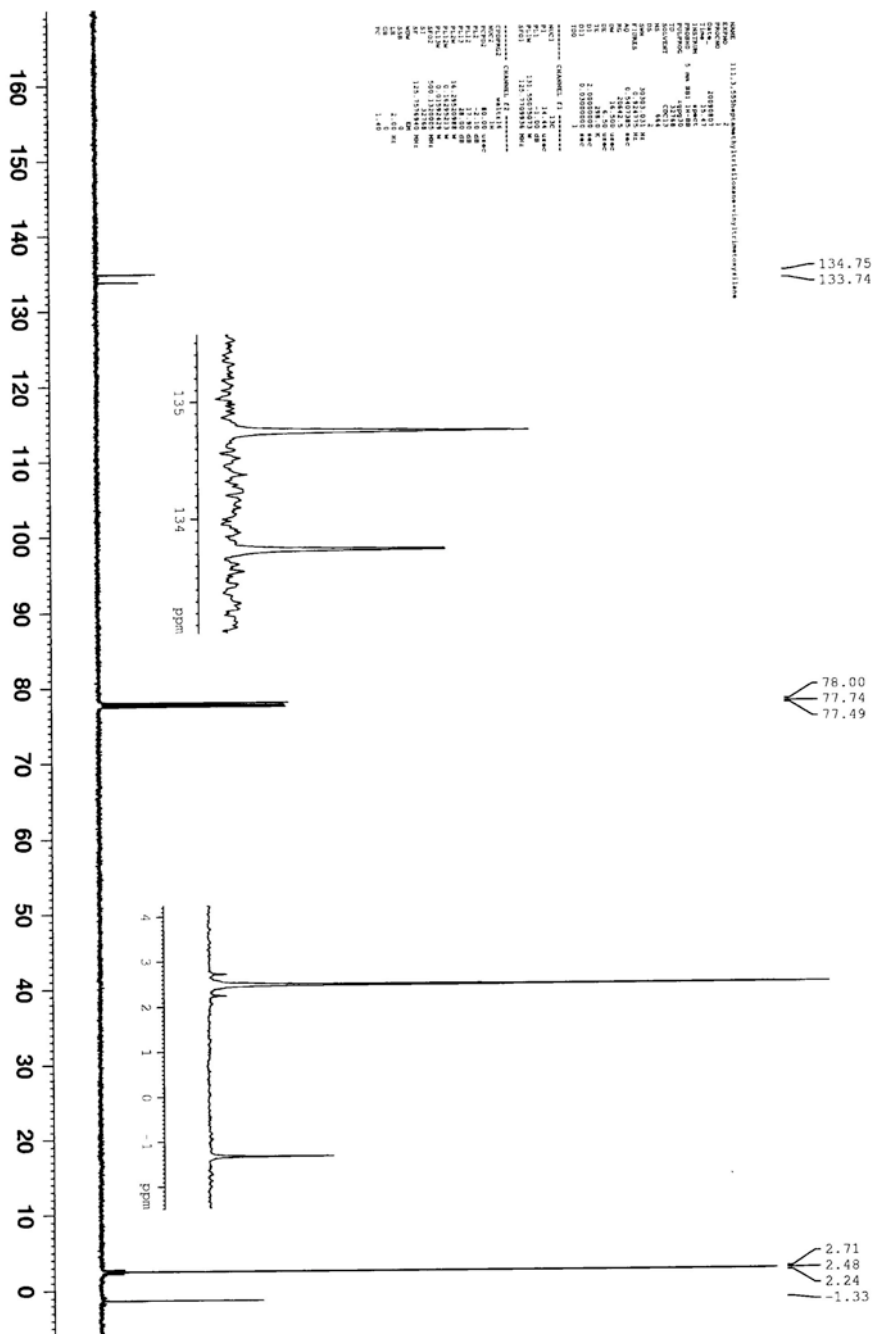

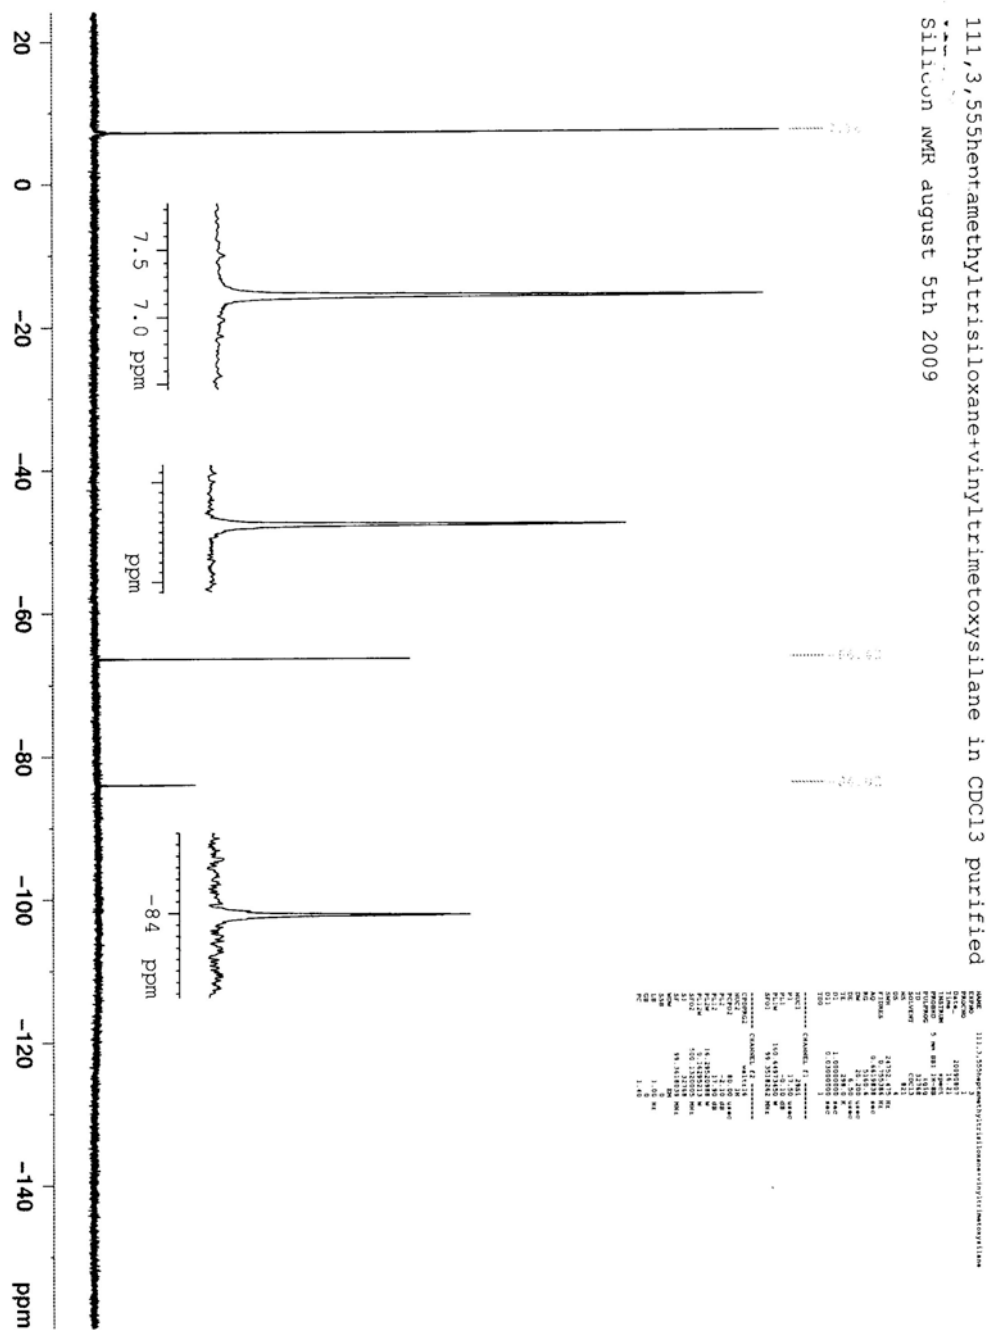

**Table 1 Entry #5:**

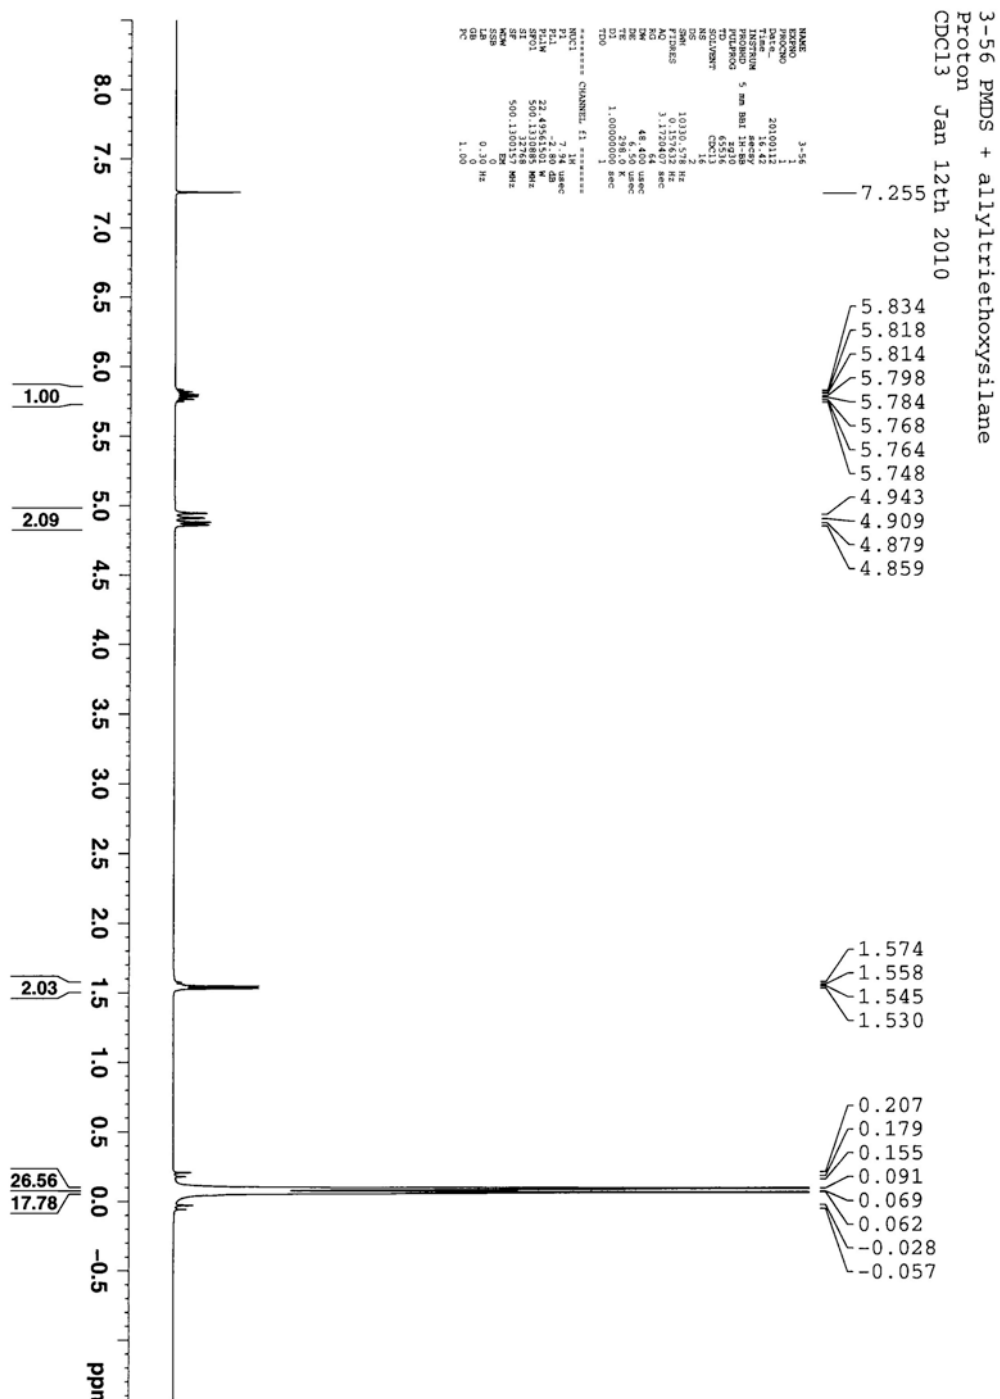

3-56 PMDS  
Carbon  
CDCl<sub>3</sub> Jan 12th 2010

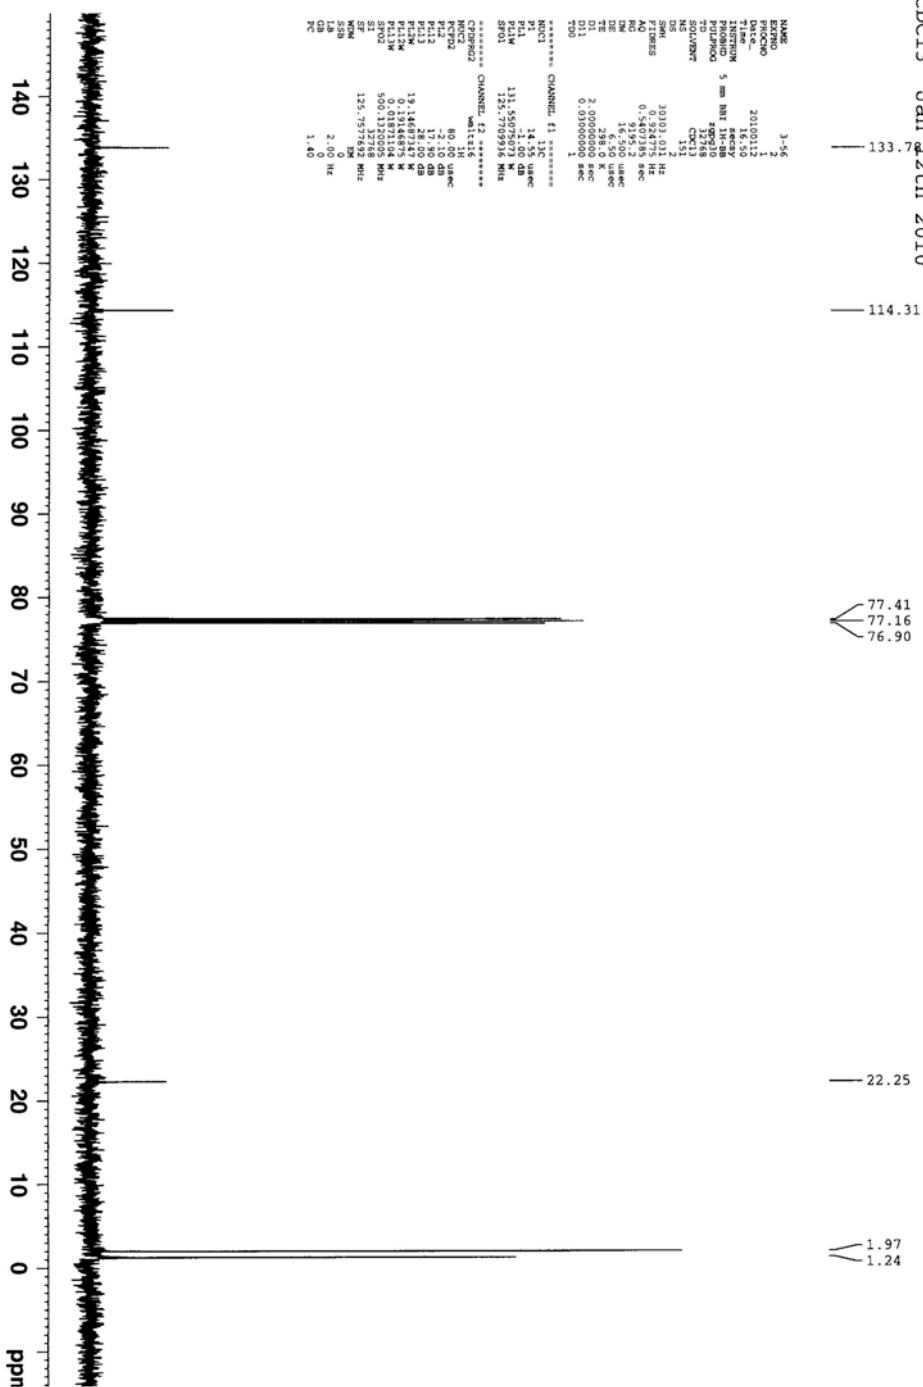

3-56  
Silicom  
CDCl3 Jan 12th 2010

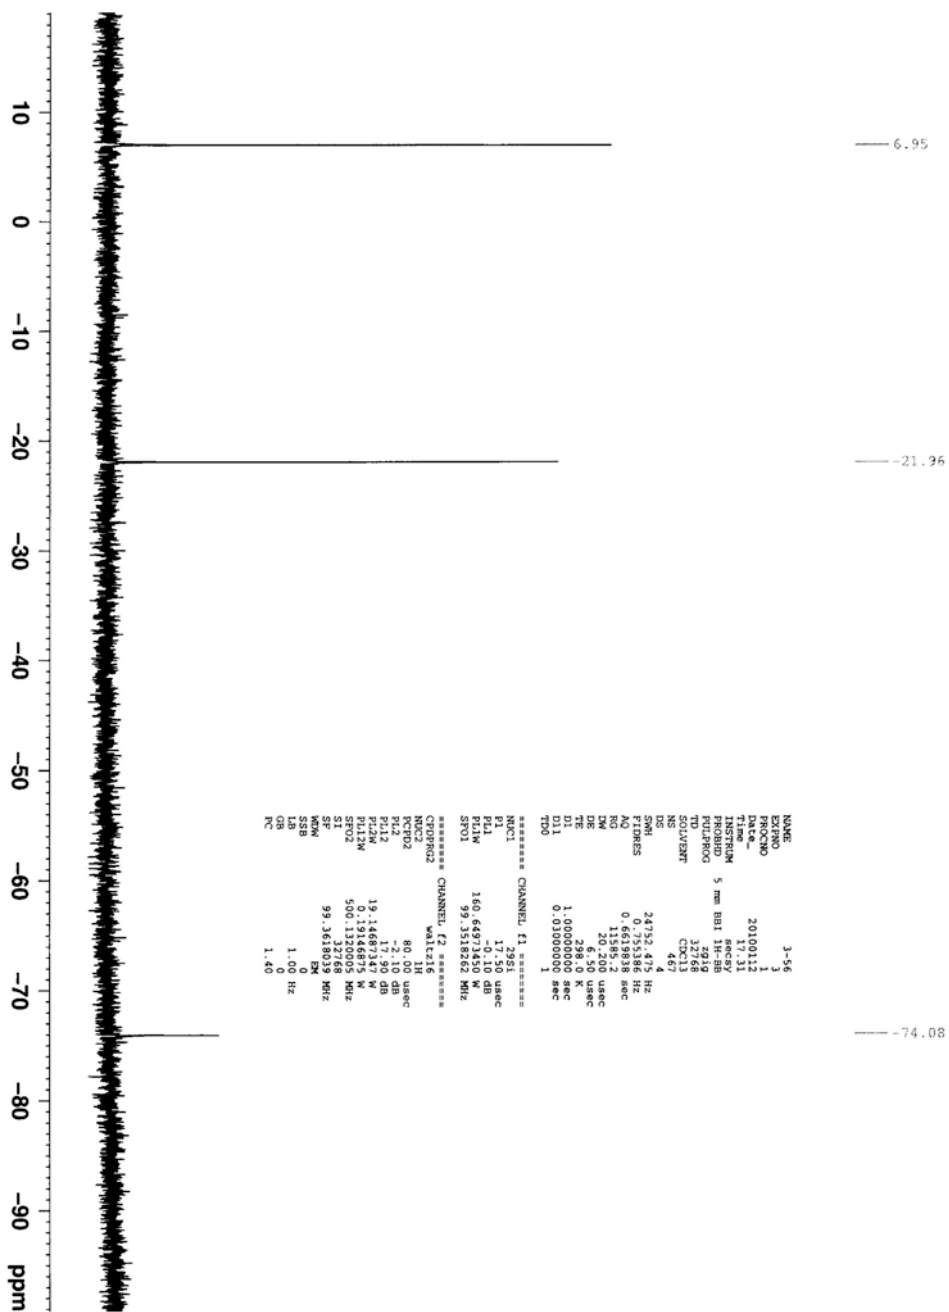





1.968

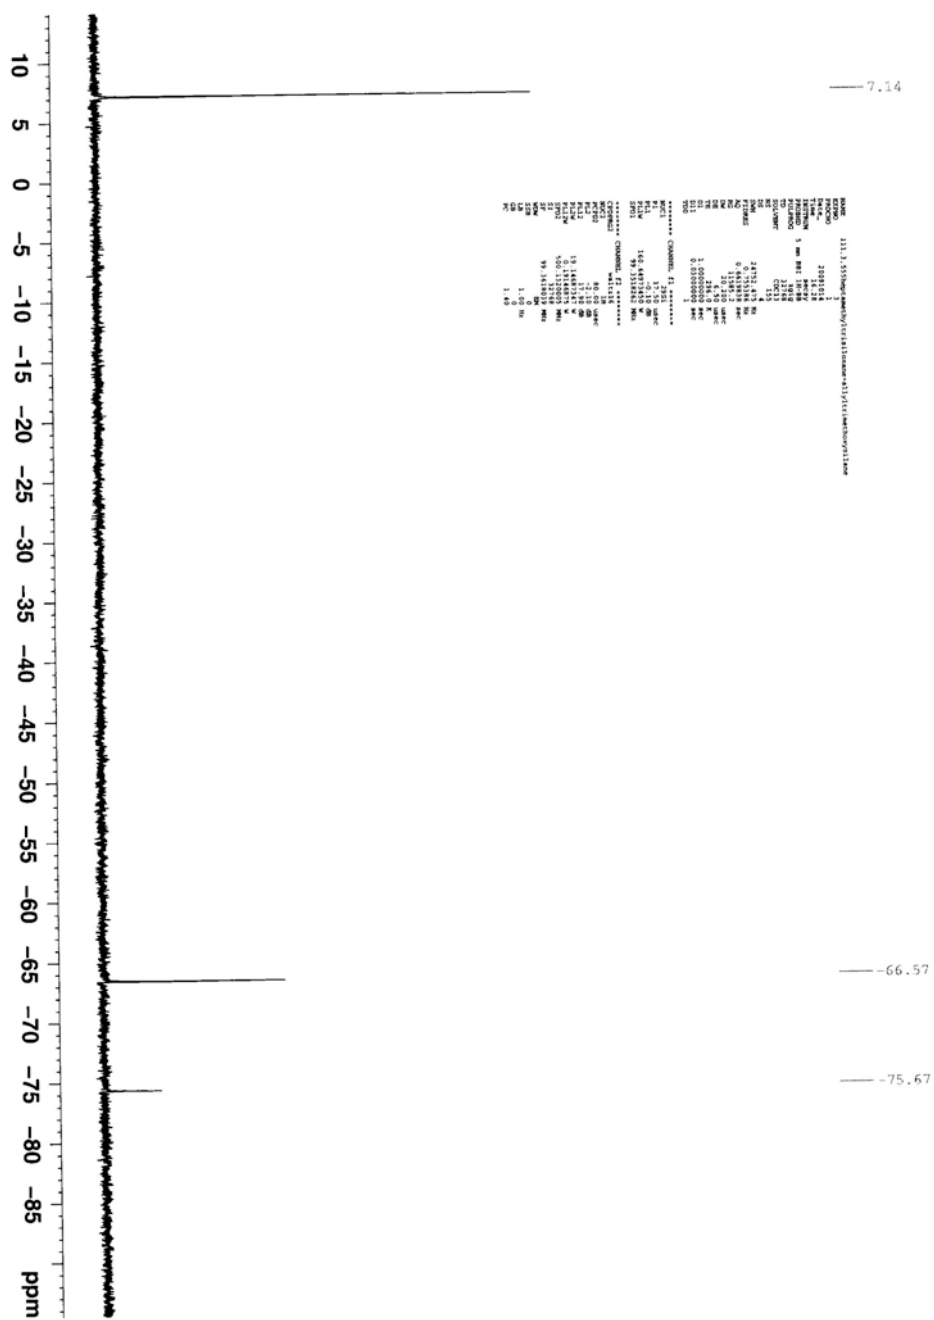

**Table 1 Entry #7:**

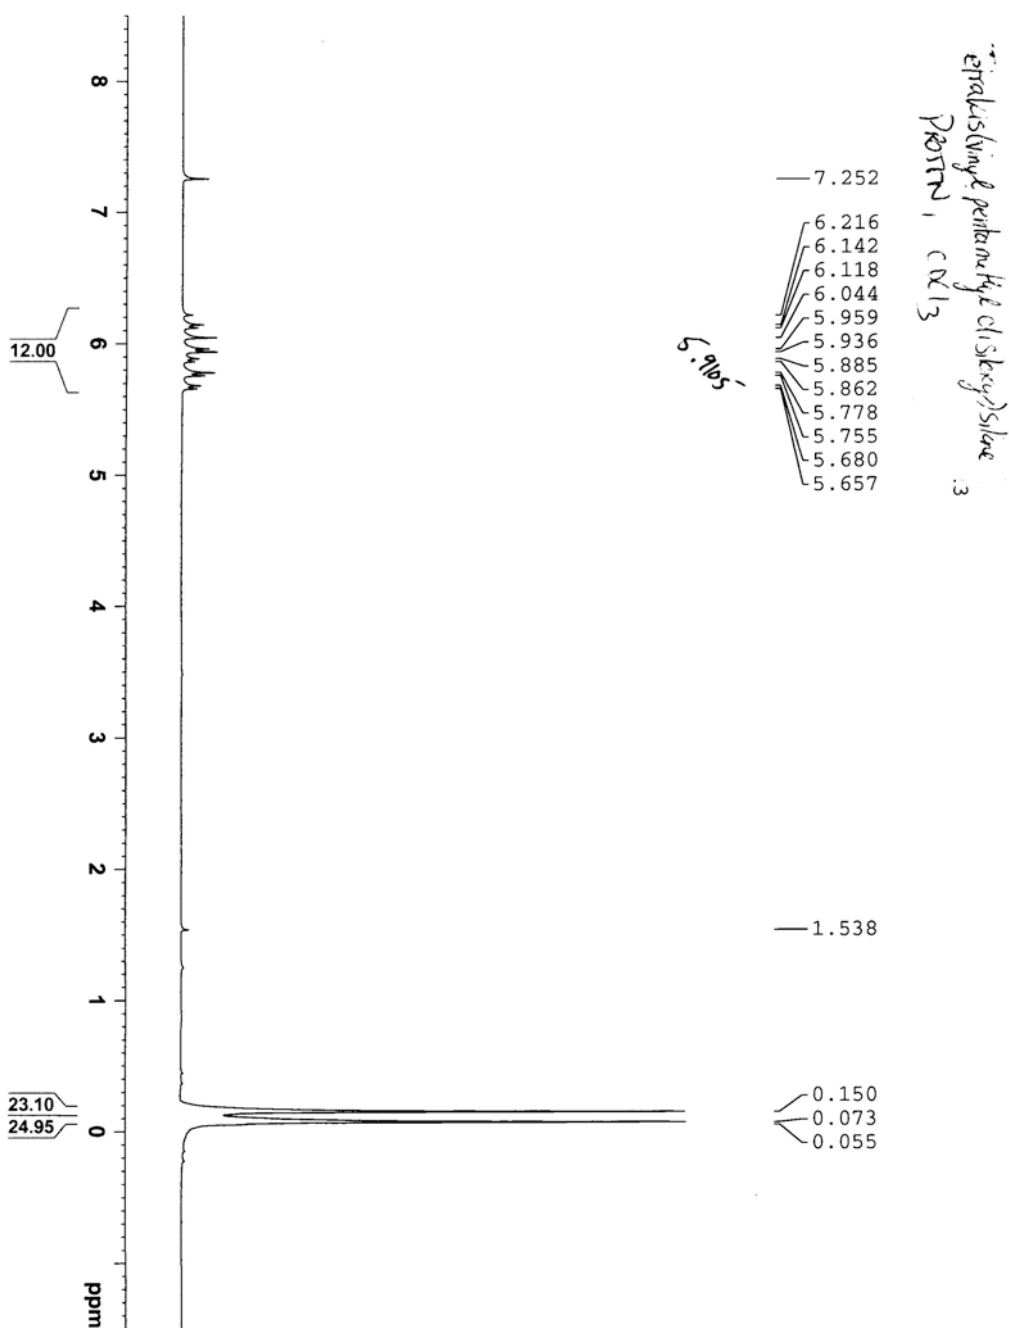

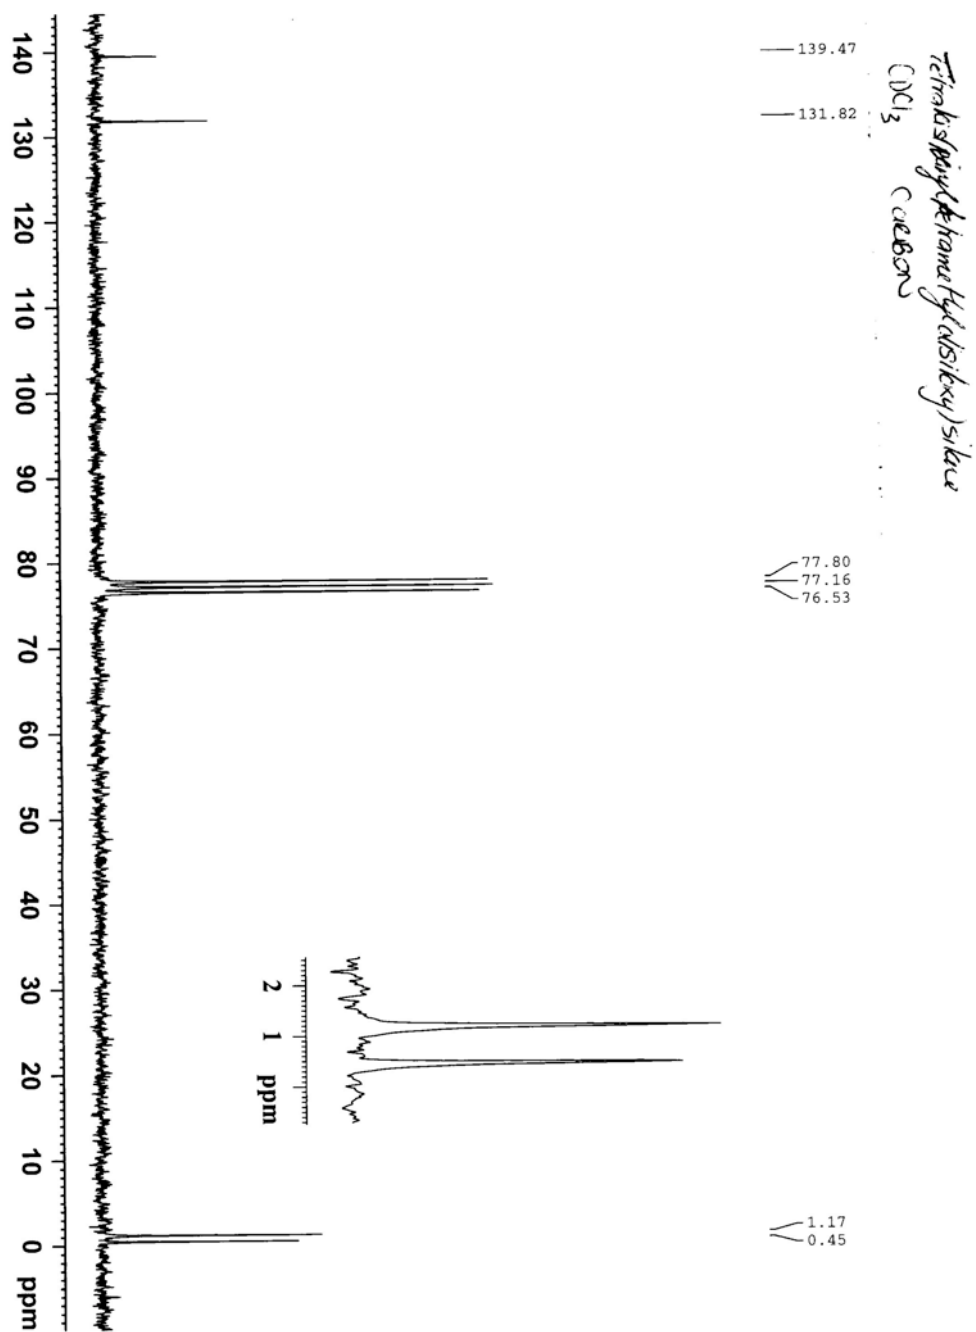

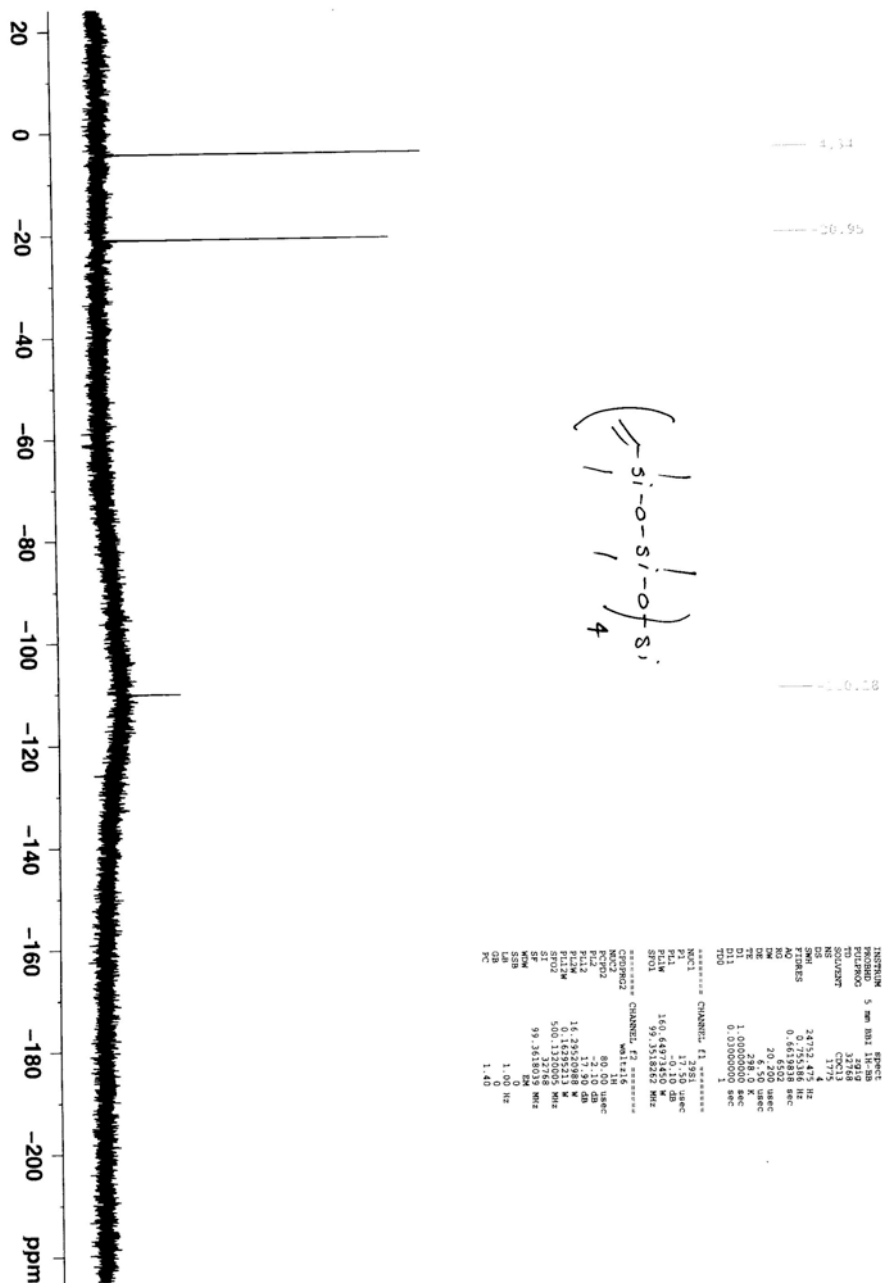
$$\left( \begin{array}{c} \text{CH}_2 \\ | \\ \text{Si-O-Si-O-Si} \end{array} \right)_4$$

**Table 1 Entry #8:**

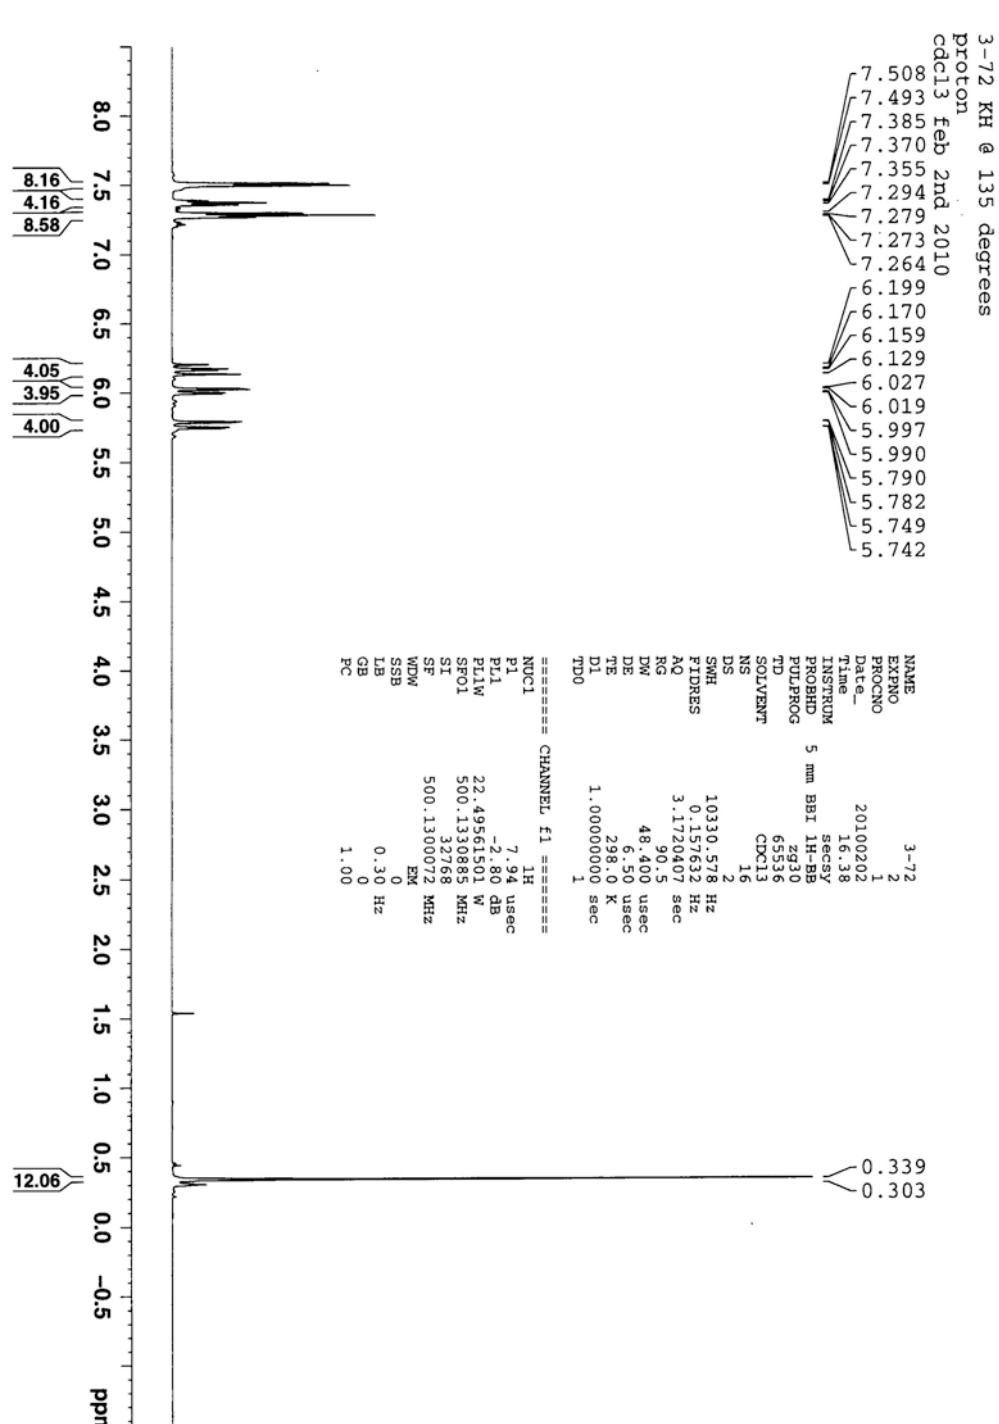

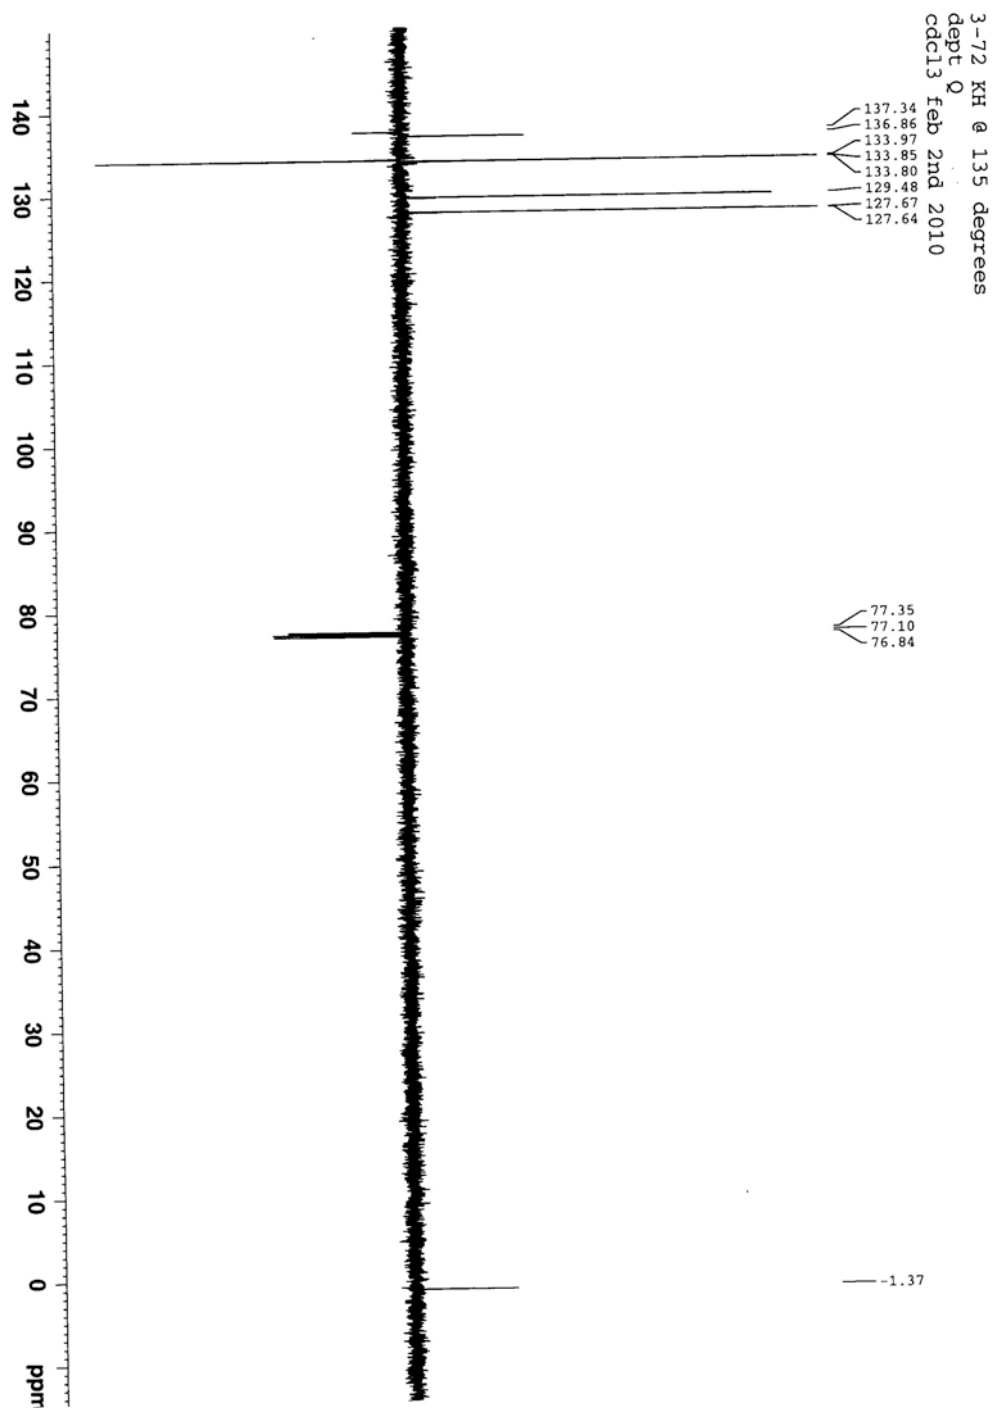

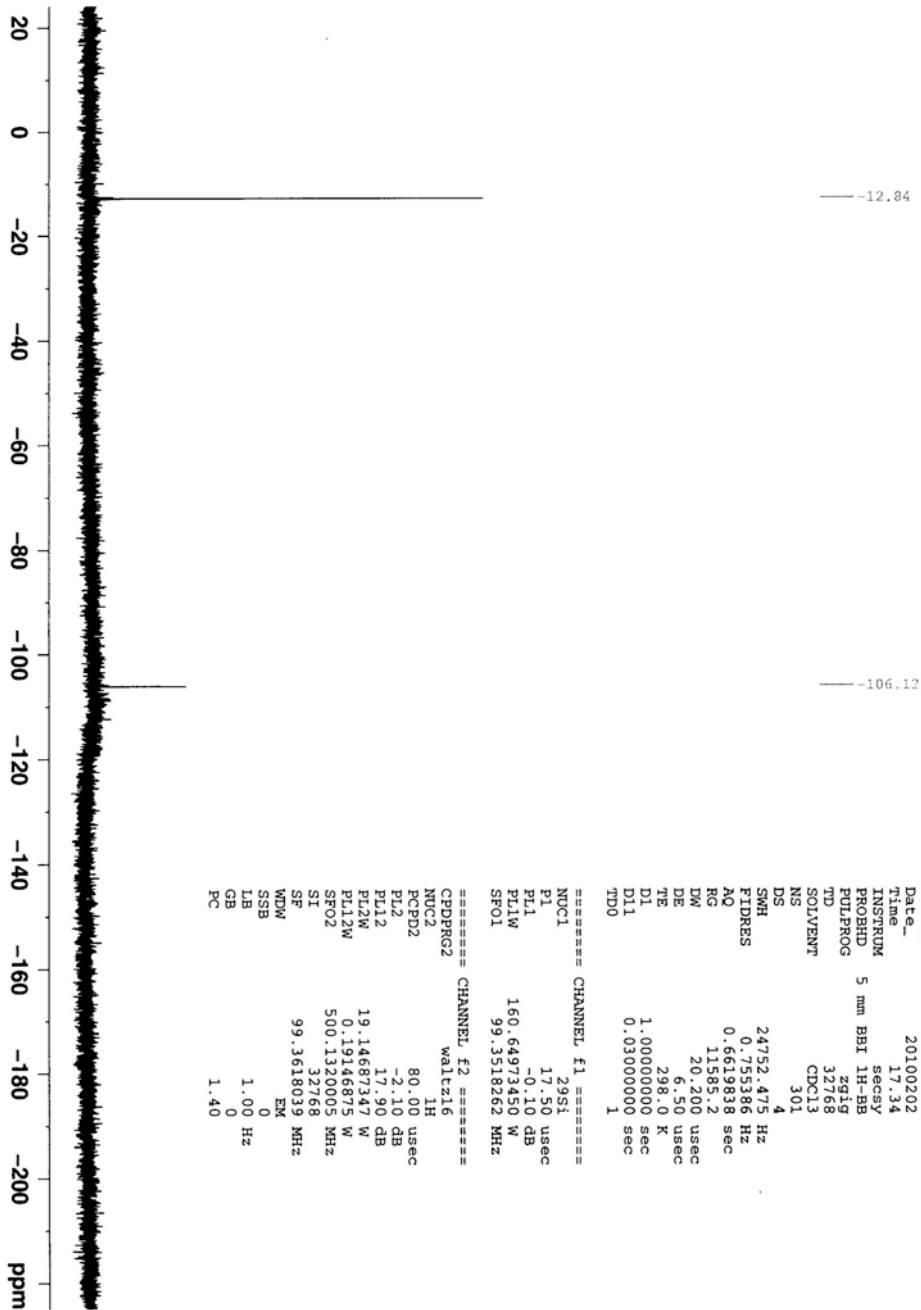



Compound 6 Spectra:

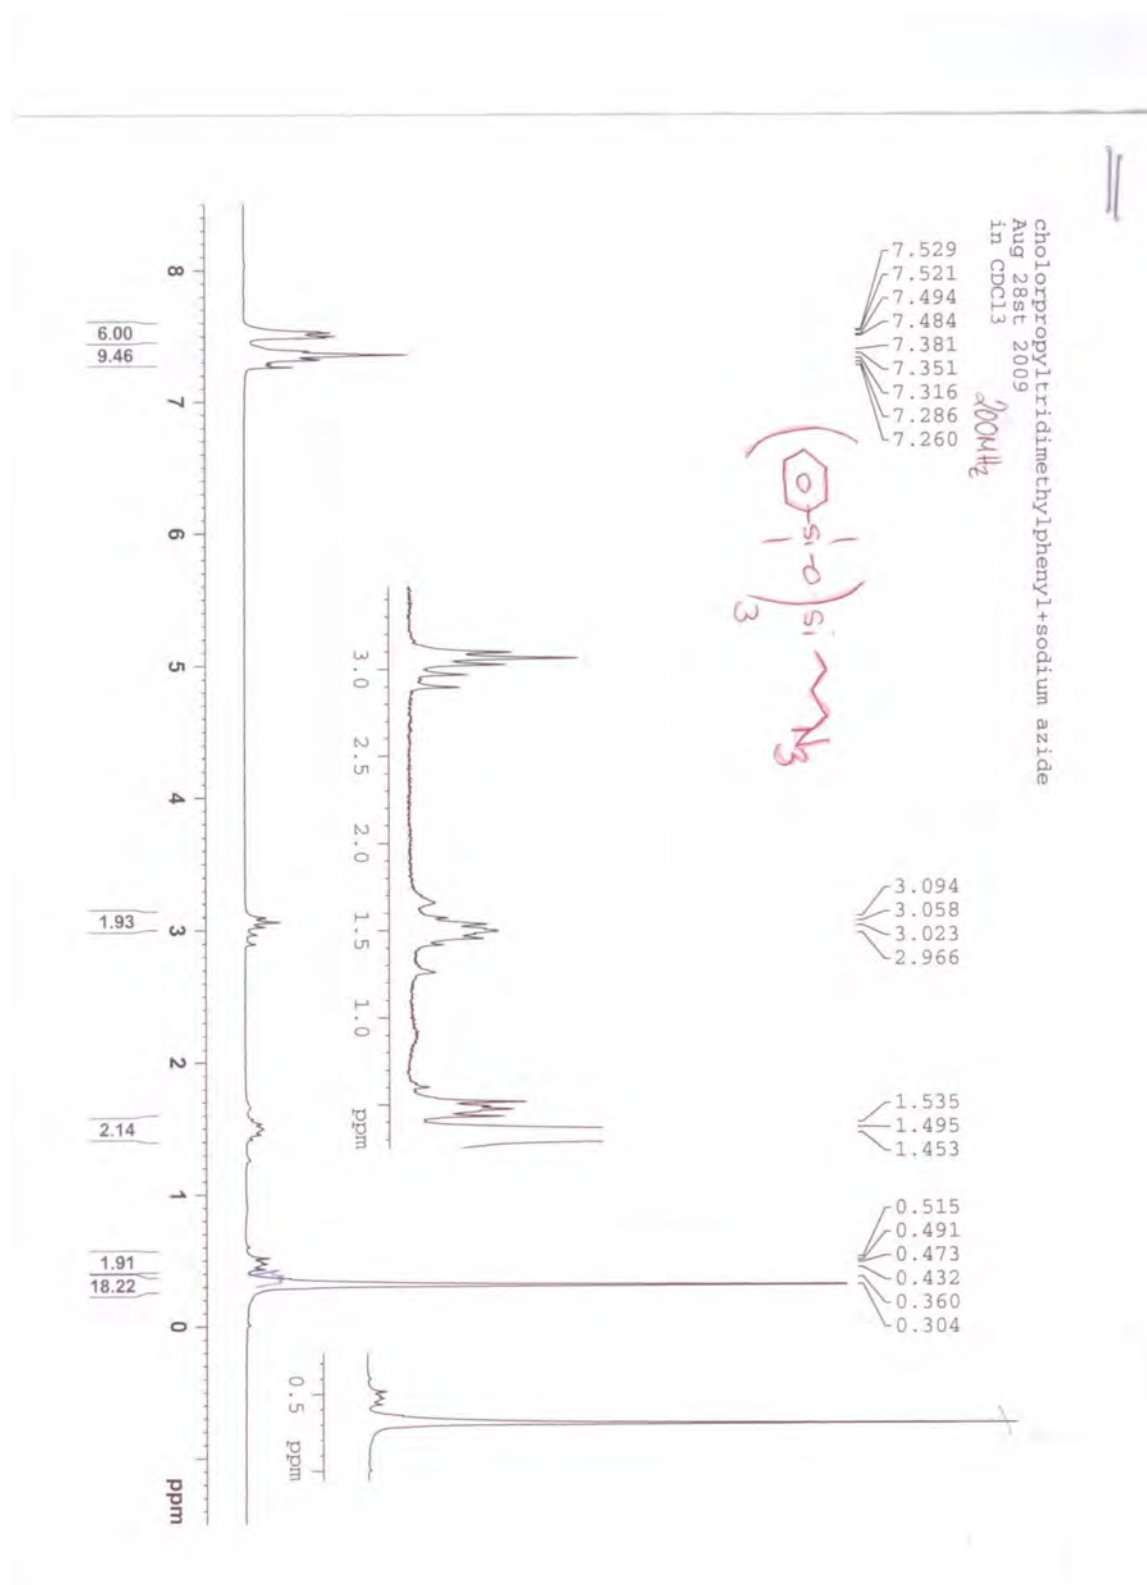



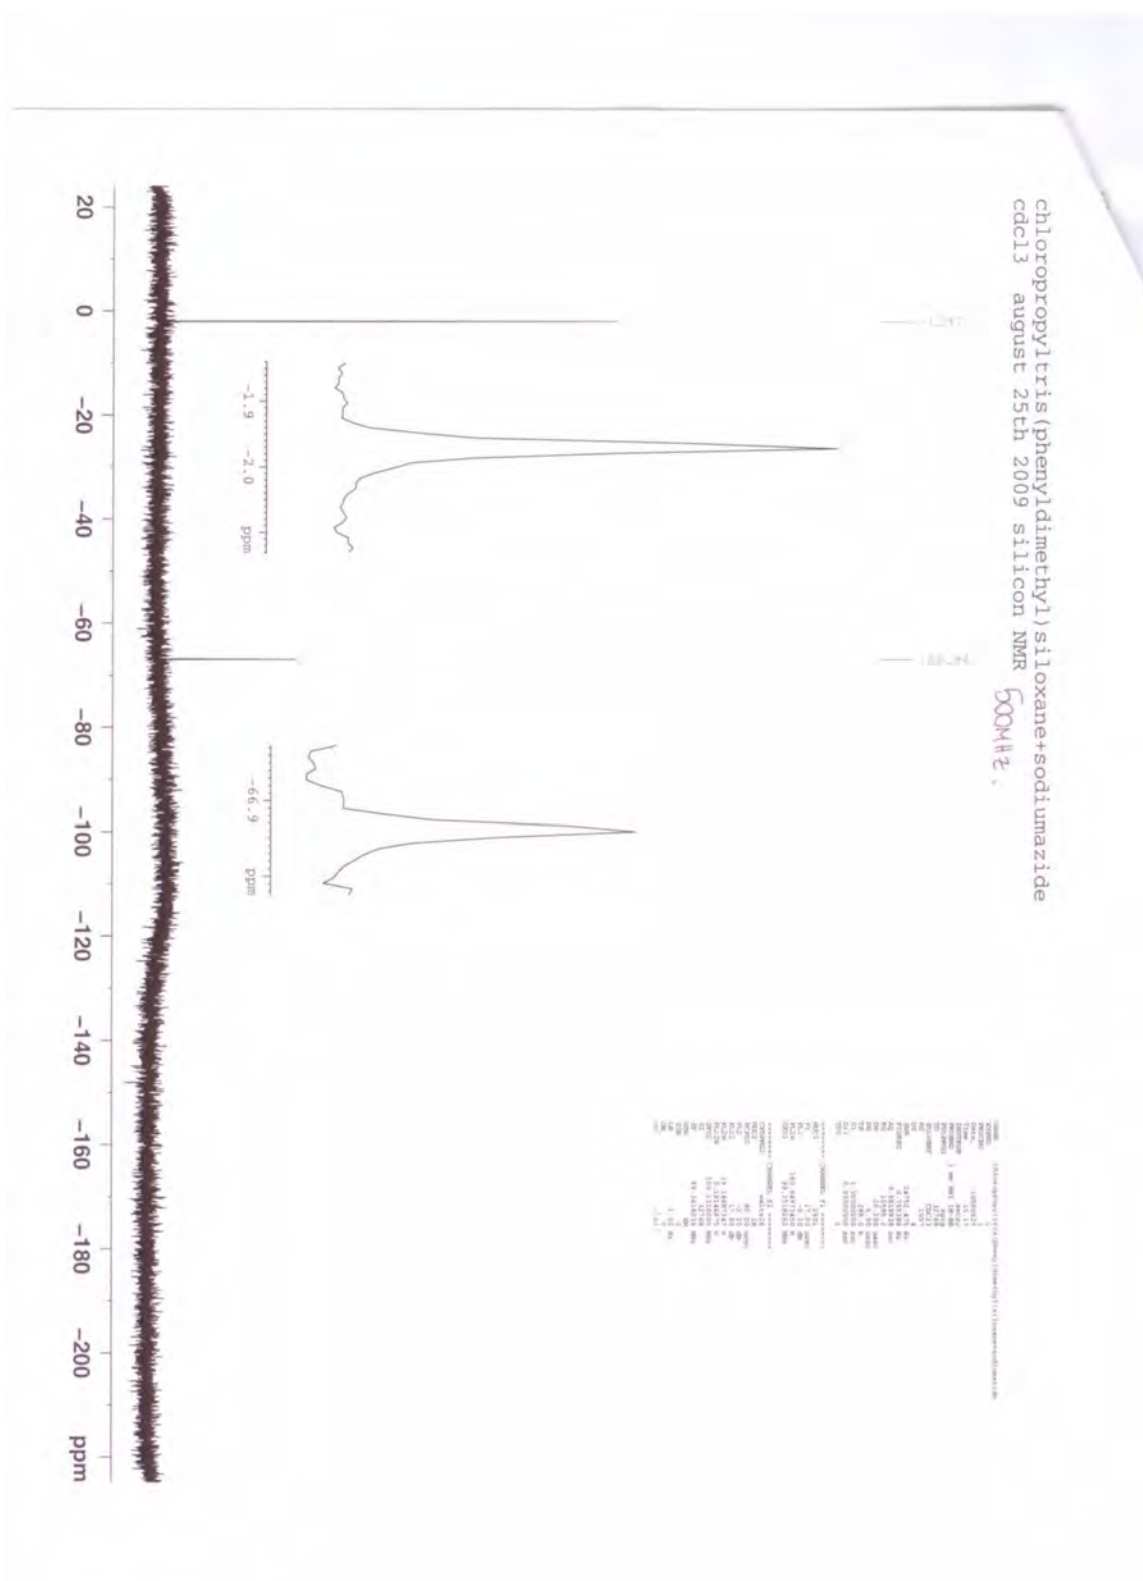

Compound 7 Spectra:

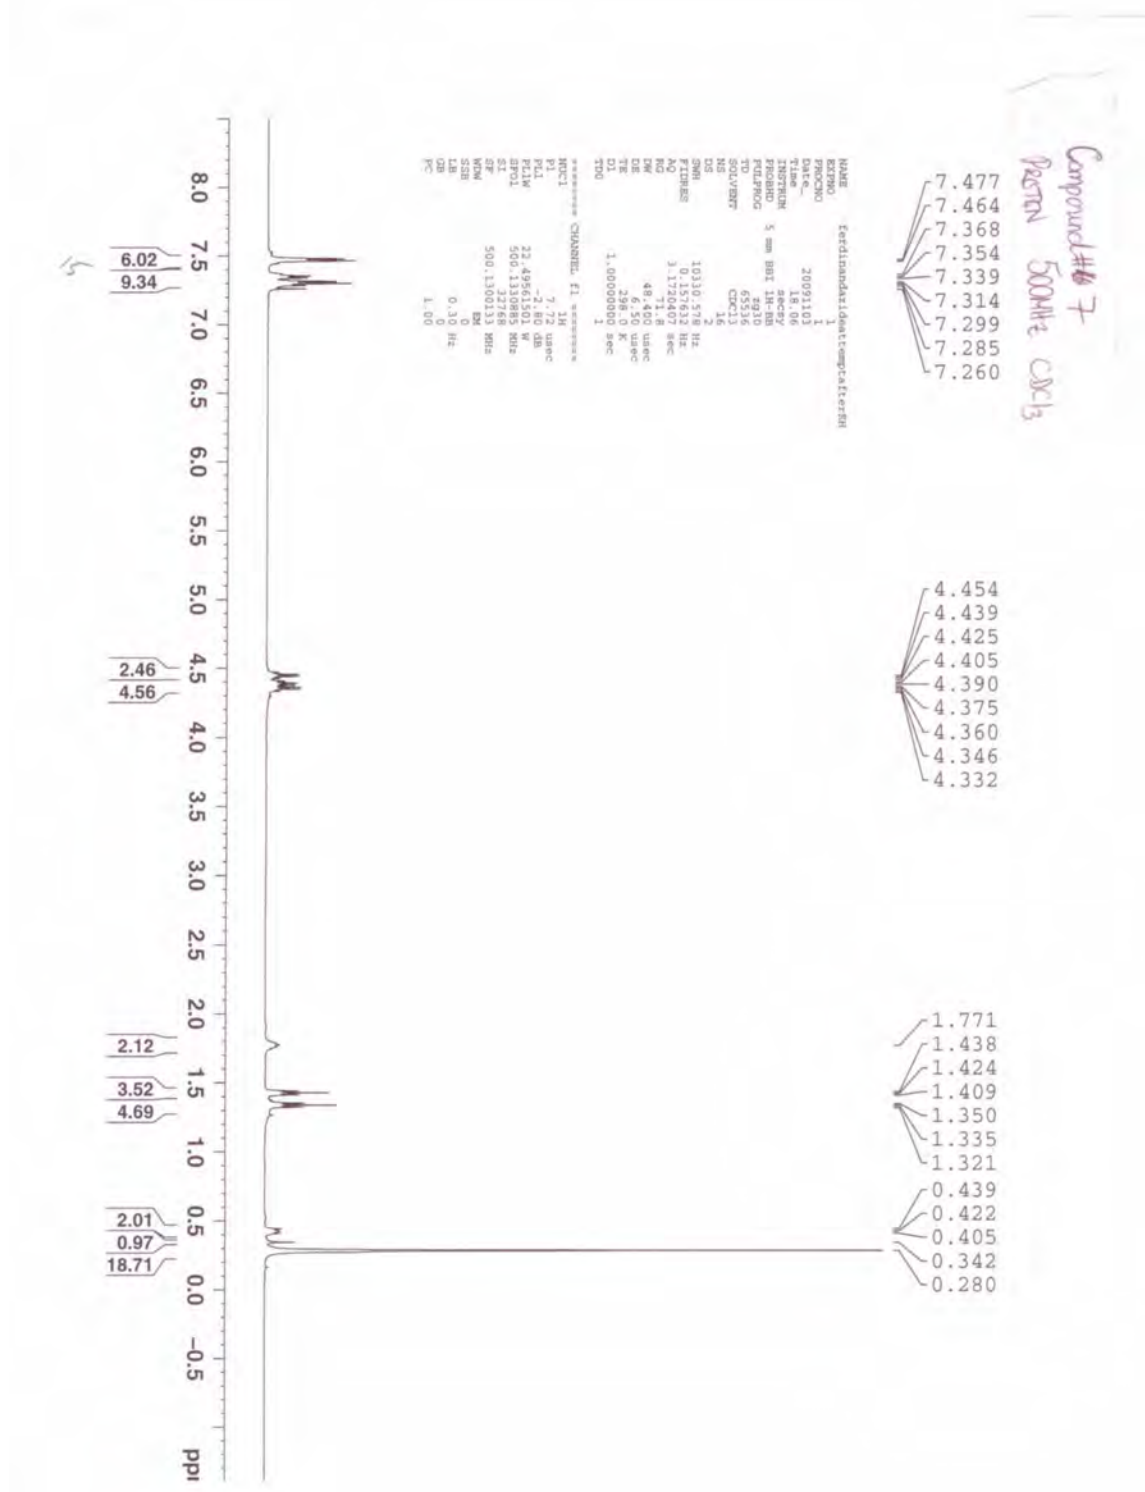

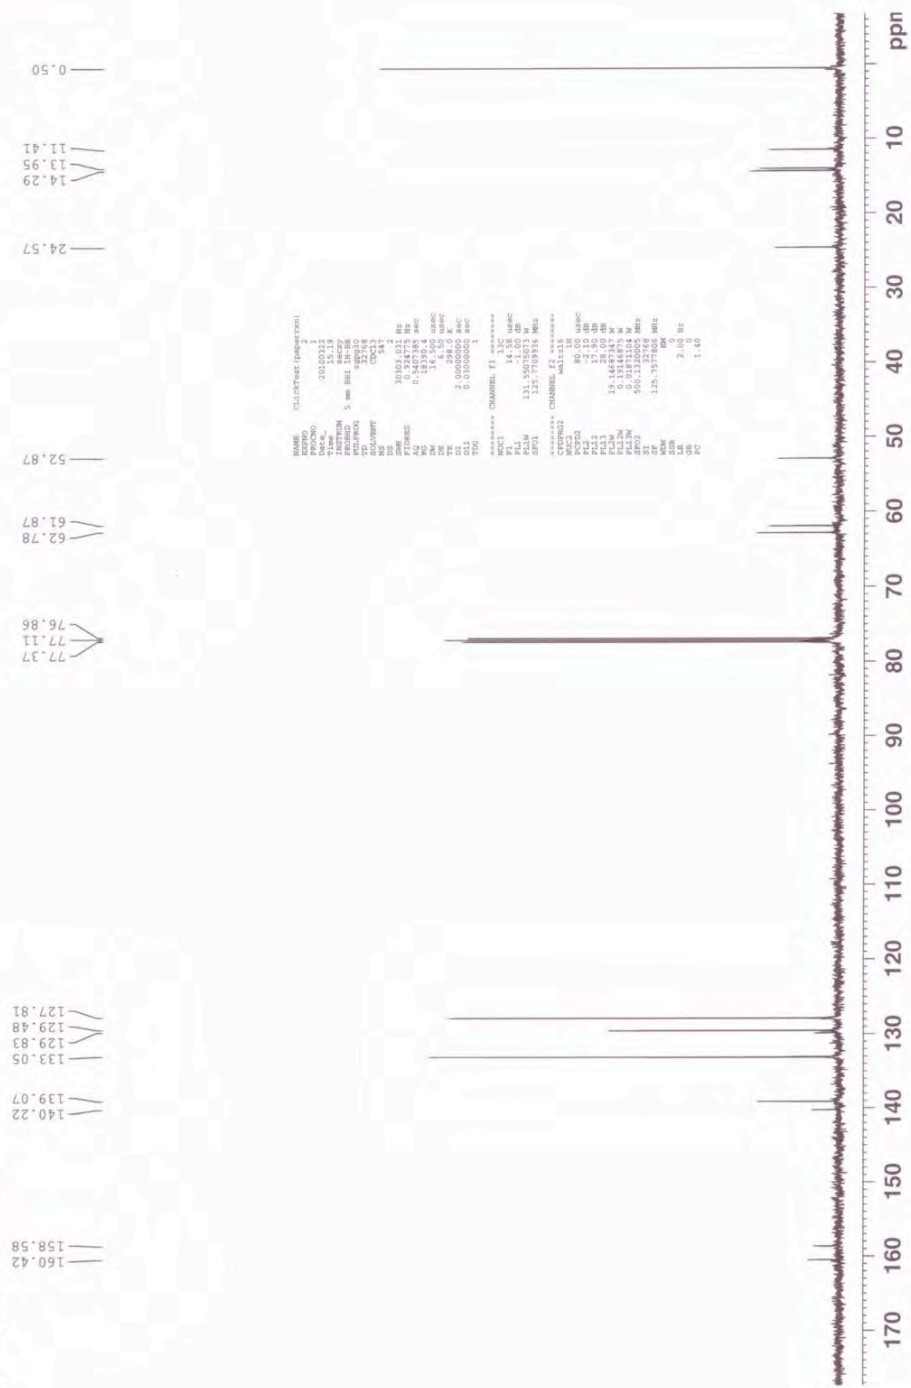

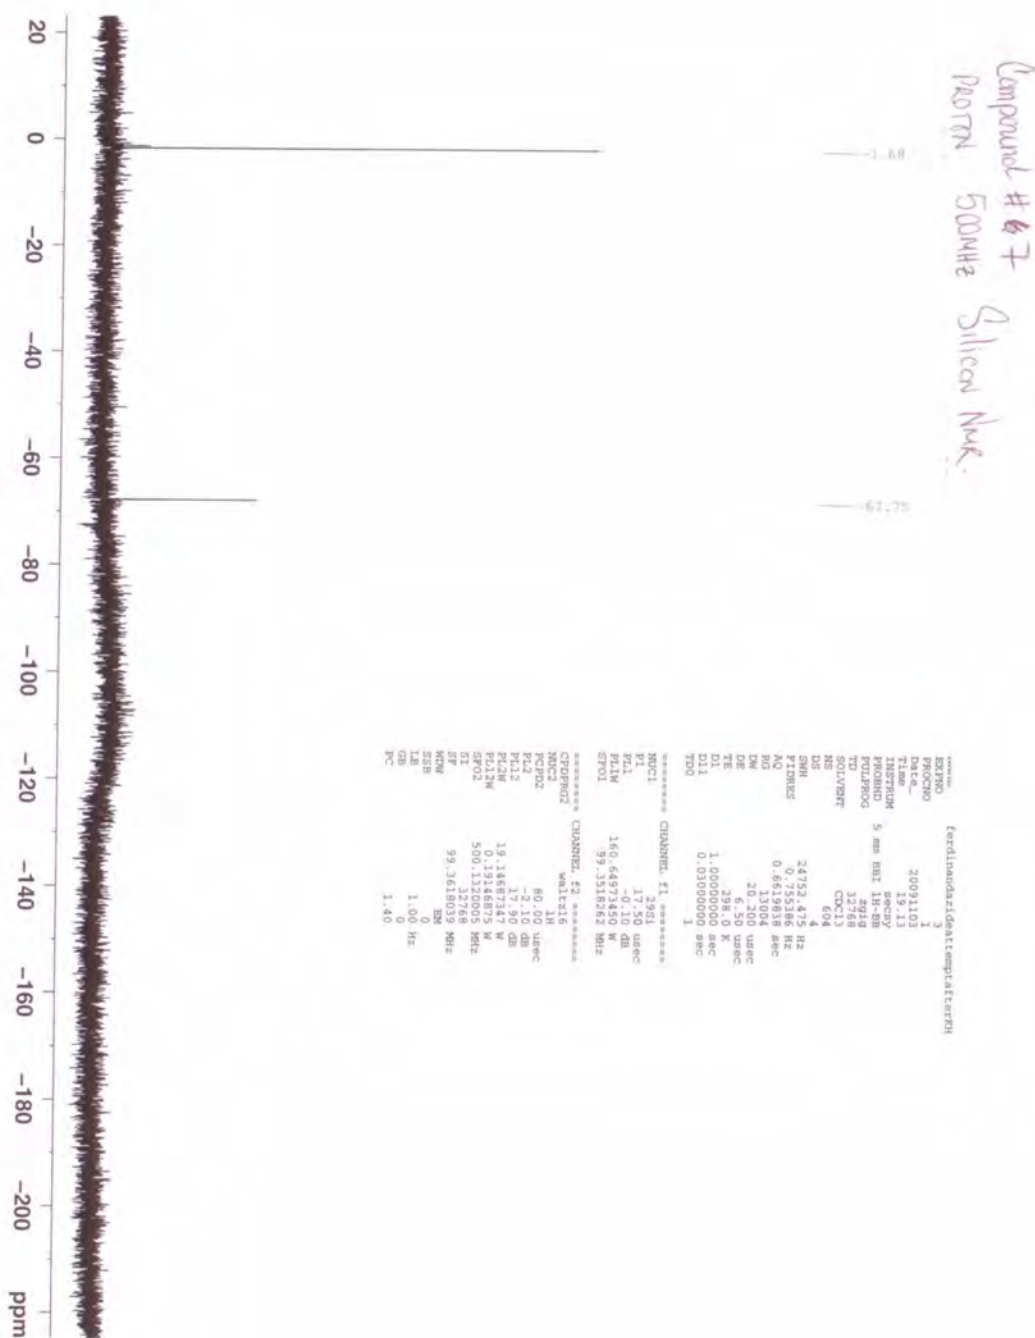

Compound 8 Spectra:

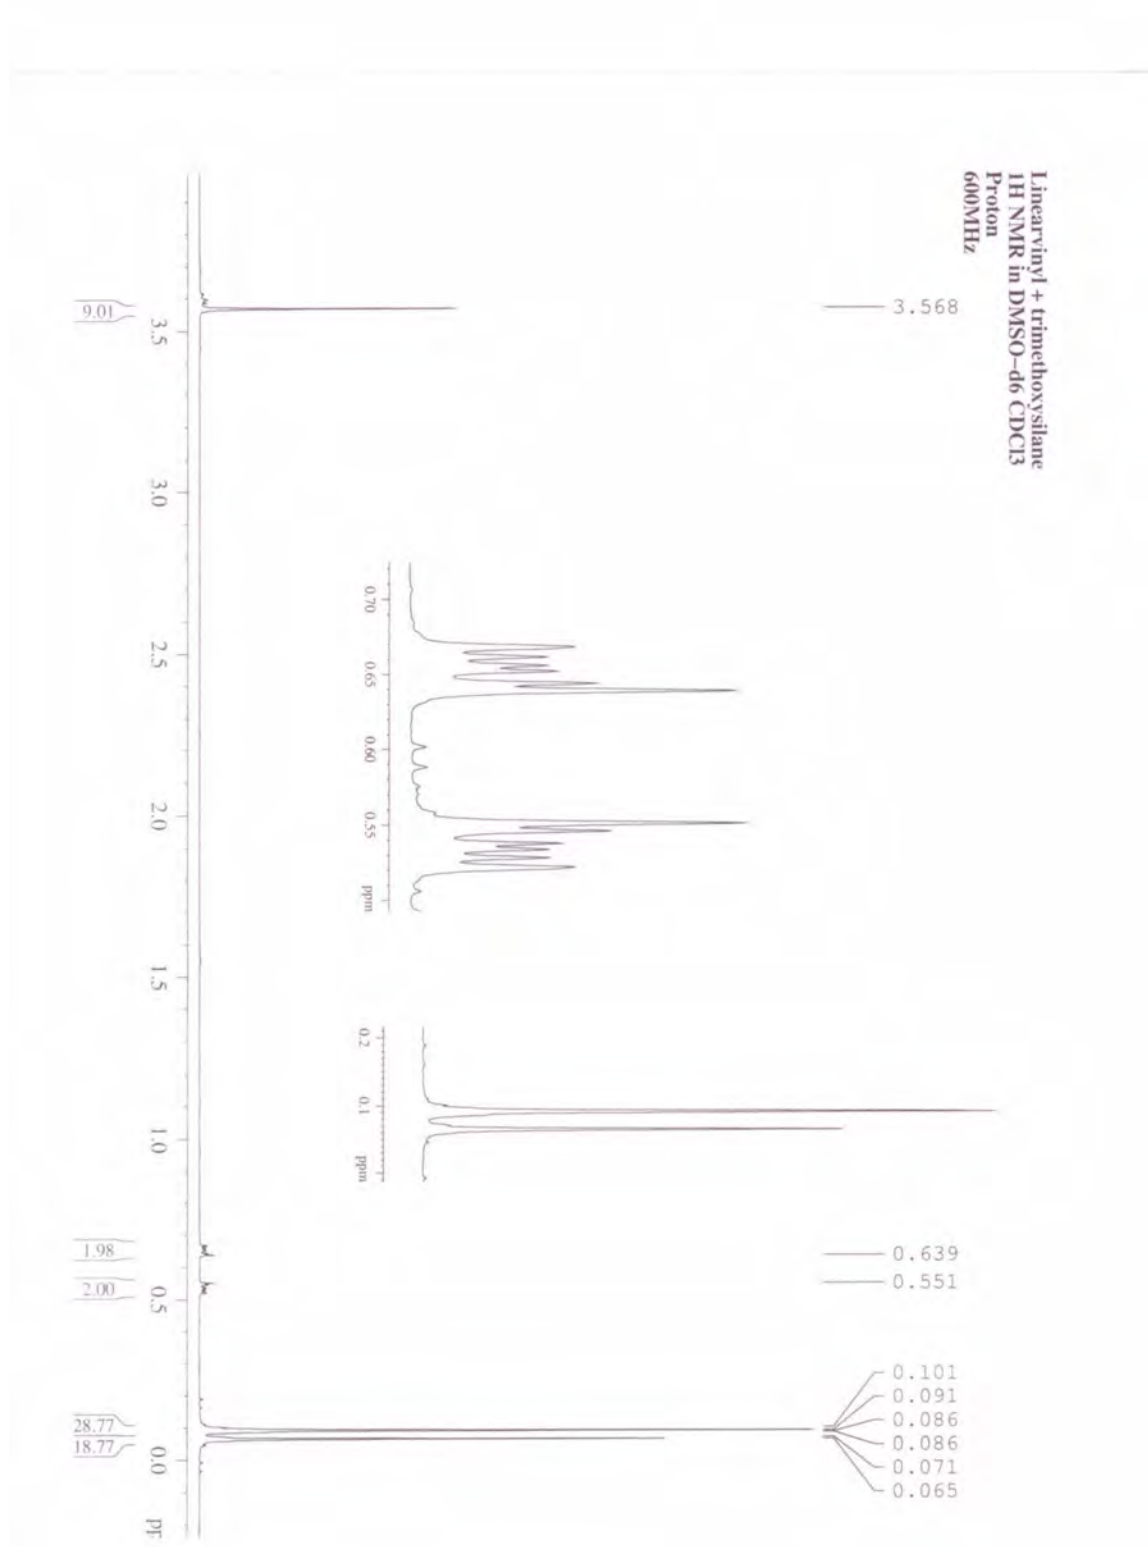

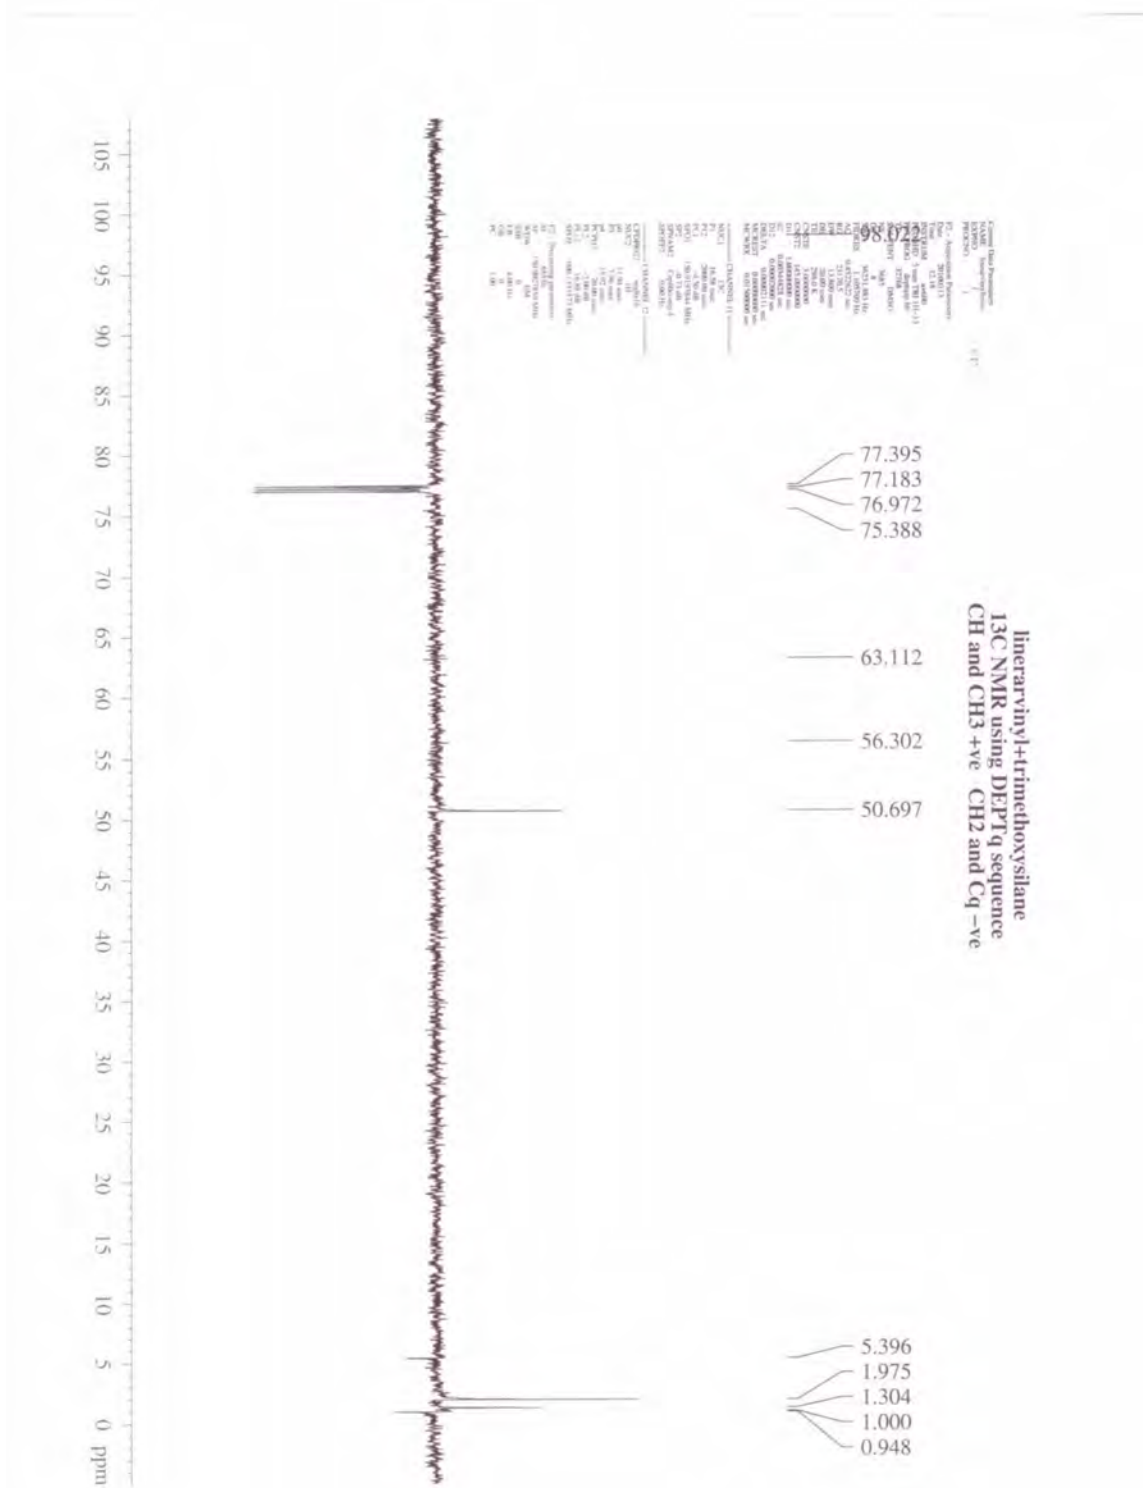

Supplement: c0cc00369g.pdf [file c0cc00369g.pdf]
